# Supplementary material
Source: publisher figshare collection journal article supplement (https://acs.figshare.com/ndownloader/files/3624801)
Supplement: Supplementary file 1 [file 3624801]

# Supporting information

## **Minimization of synthetic polymer ligands for specific recognition and neutralization of a toxic peptide**

Haejoo Lee<sup>†</sup>, Yu Hoshino<sup>†\*</sup>, Yusuke Wada<sup>†</sup>, Yuka Arata<sup>†</sup>, Atsushi Maruyama<sup>‡</sup>, Yoshiko Miura<sup>†</sup>

<sup>†</sup>Department of Chemical Engineering, Kyushu University, 744 Motoooka, Nishi-ku, Fukuoka 819-0395, Japan

<sup>‡</sup>Department of Biomolecular Engineering, Graduate School of Bioscience and Biotechnology, Tokyo Institute of Technology, Nagatsuta 4259, Midori-ku, Yokohama 226-8501, Japan

yhoshino@chem-eng.kyushu-u.ac.jp

## S1. Preparation of minimized synthetic polymer ligands

### 1. Preparation of BPA

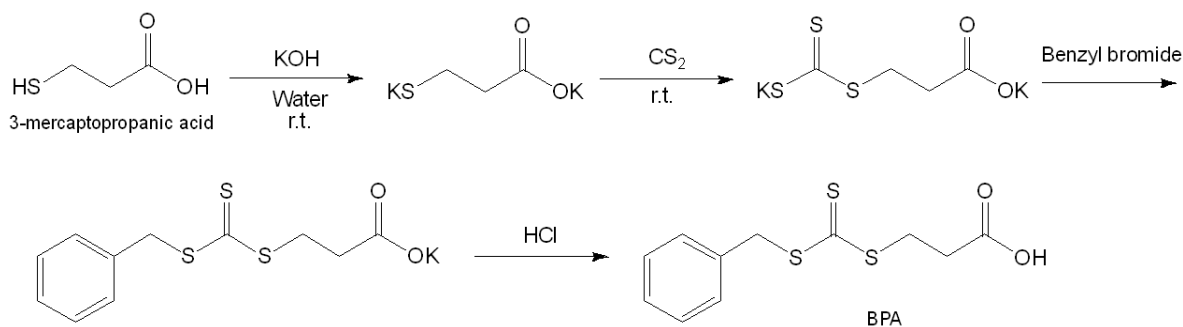

**Scheme S1-1.**

BPA was prepared according to Davis and his coworkers<sup>1</sup>. 3-Mercaptopropionic acid (10 mL, 115 mmol) was added to potassium hydroxide (12.9 g in 125 mL H<sub>2</sub>O, 230 mmol). Subsequently, 15.3 mL CS<sub>2</sub> was added dropwise. The resulting orange-colored solution was stirred for 5 h at room temperature, after which 13.65 mL benzyl bromide (55.4 mmol) was added. Benzyl bromide turned the color of the solution to opaque yellow. The mixture was heated to 80 °C for 12 h and cooled. Chloroform (100 mL) was added next, and 100 mL HCl (1 M in H<sub>2</sub>O) was slowly added until the organic layer turned yellow. The aqueous layer was extracted with chloroform (3 x 100 mL), while the organic layer was washed with distilled water (3 x 100 mL). Finally, the organic layer was dried over MgSO<sub>4</sub>. BPA was recrystallized in hexane. Yield: 65 %.

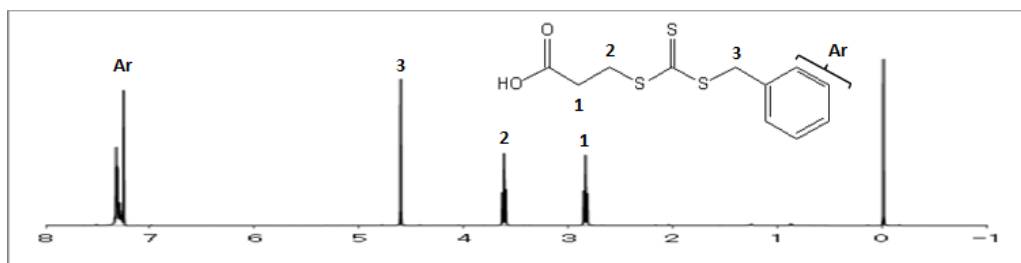

**Figure S1-1.** <sup>1</sup>H NMR of BPA in CDCl<sub>3</sub>

## 2. Preparation of 300-mer, 30-mer, 15-mer and 9-mer polymer ligands

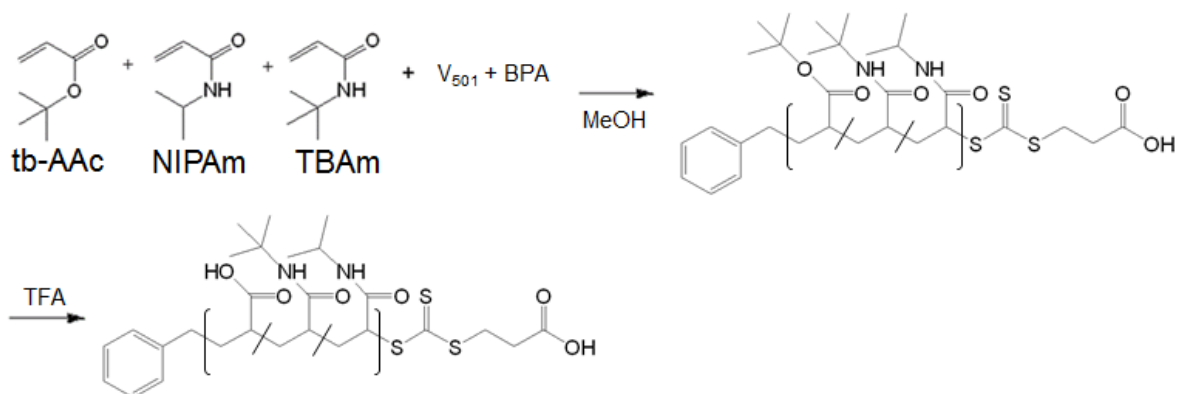

**Scheme S1-2.**

Reversible addition-fragmentation chain-transfer (RAFT) was used to obtain 300-mer, 30-mer, 15-mer and 9-mer polymer ligands with narrow molecular weight distribution. BPA was used as chain transfer agent. *Tert*-butyl acrylate (tb-AAc), *N*-isopropyl acrylamide (NIPAm), *N*-*tert*-butylacrylamide (TBAm), BPA (20.4 or 40.8 mg) and  $V_{501}$  (6.3 mg) were dissolved in methanol (~1mL) according to the feed ratio listed in Table S1-1. Solutions were degassed in three cycles of freeze-evacuate-thaw, sealed in an ampoule, and heated at 70 °C for 3 h in an oil bath. Products were precipitated with brine and distilled water, and conversion rates were calculated from  $^1\text{H}$  NMR in MeOD. After the composition and molecular weight were determined by  $^1\text{H}$  NMR and GPC, polymer ligands were deprotected with TFA.

**Table S1-1.** Feed ratio and characteristics of resulting polymers

|                      | TBAm (x)                         | <i>tb</i> -AAc (y)               | NIPAm<br>(100-x-y)                 | Conversion<br>rate | GPC            |                |     |
|----------------------|----------------------------------|----------------------------------|------------------------------------|--------------------|----------------|----------------|-----|
|                      |                                  |                                  |                                    |                    | M <sub>n</sub> | M <sub>w</sub> | PDI |
| 30-mer<br>(T0%A5%)   | 0                                | 5 mol%<br>14.1 mg,<br>0.11 mmol  | 95 mol%<br>244.2 mg,<br>2.15 mmol  | 97                 | 3400           | 4600           | 1.4 |
| 30-mer<br>(T0%A10%)  | 0                                | 10 mol%<br>28.2 mg,<br>0.22 mmol | 90 mol%<br>231.3 mg,<br>2.04 mmol  | 98                 | 2800           | 3700           | 1.3 |
| 30-mer<br>(T0%A20%)  | 0                                | 20 mol%<br>56.4 mg,<br>0.44 mmol | 80 mol%<br>205.6 mg,<br>1.82 mmol  | 98                 | 2600           | 3400           | 1.3 |
| 30-mer<br>(T10%A0%)  | 10 mol%<br>28.6 mg,<br>0.23 mmol | 0                                | 90 mol%<br>231.3 mg,<br>2.04 mmol  | 97                 | 2800           | 3800           | 1.4 |
| 30-mer<br>(T10%A10%) | 10 mol%<br>28.6 mg,<br>0.23 mmol | 10 mol%<br>28.2 mg,<br>0.22 mmol | 80 mol%<br>205.6 mg,<br>1.82 mmol  | 94                 | 2700           | 3600           | 1.3 |
| 30-mer<br>(T20%A0%)  | 20 mol%<br>57.2 mg,<br>0.45 mmol | 0                                | 80 mol%<br>205.6 mg,<br>1.82 mmol  | 93                 | 3100           | 4100           | 1.4 |
| 30-mer<br>(T20%A5%)  | 20 mol%<br>57.2 mg,<br>0.45 mmol | 5 mol%<br>14.1 mg,<br>0.11 mmol  | 75 mol%<br>192.8 mg,<br>1.7 mmol   | 98                 | 2500           | 3300           | 1.3 |
| 30-mer<br>(T20%A10%) | 20 mol%<br>57.2 mg,<br>0.45 mmol | 10 mol%<br>28.2 mg,<br>0.22 mmol | 70 mol%<br>179.9 mg,<br>1.59 mmol  | 96                 | 2800           | 3600           | 1.3 |
| 30-mer<br>(T20%A20%) | 20 mol%<br>57.2 mg,<br>0.45 mmol | 20 mol%<br>56.4 mg,<br>0.44 mmol | 60 mol%<br>154.2 mg,<br>1.36 mmol  | 96                 | 2600           | 3400           | 1.3 |
| 30-mer<br>(T40%A0%)  | 40 mol%<br>114.4 mg,<br>0.9 mmol | 0                                | 60 mol%<br>154.2 mg,<br>1.36 mmol  | 99                 | 2700           | 3600           | 1.3 |
| 30-mer<br>(T40%A5%)  | 40 mol%<br>114.4 mg,<br>0.9 mmol | 5 mol%<br>14.1 mg,<br>0.11 mmol  | 55 mol%<br>141.35 mg,<br>1.25 mmol | 98                 | 2500           | 3400           | 1.4 |
| 30-mer<br>(T40%A10%) | 40 mol%<br>114.4 mg,<br>0.9 mmol | 10 mol%<br>28.2 mg,<br>0.22 mmol | 50 mol%<br>129.0 mg,<br>1.14 mmol  | 95                 | 2600           | 3500           | 1.3 |
| 30-mer<br>(T40%A20%) | 40 mol%<br>114.4 mg,<br>0.9 mmol | 20 mol%<br>56.4 mg,<br>0.44 mmol | 40 mol%<br>102.8 mg,<br>0.91 mmol  | 97                 | 2500           | 3200           | 1.3 |
| 15-mer<br>(T20%A0%)  | 20 mol%<br>57.2 mg,<br>0.45 mmol | 0                                | 80 mol%<br>205.6 mg,<br>1.82 mmol  | 93                 | 1500           | 1700           | 1.2 |
| 15-mer<br>(T20%A5%)  | 20 mol%<br>57.2 mg,<br>0.45 mmol | 5 mol%<br>14.1 mg,<br>0.11 mmol  | 75 mol%<br>192.8 mg,<br>1.7 mmol   | 96                 | 1400           | 1600           | 1.1 |
| 15-mer<br>(T20%A10%) | 20 mol%<br>57.2 mg,<br>0.45 mmol | 10 mol%<br>28.2 mg,<br>0.22 mmol | 70 mol%<br>179.9 mg,<br>1.59 mmol  | 98                 | 1400           | 1600           | 1.1 |
| 15-mer<br>(T20%A20%) | 20 mol%<br>57.2 mg,              | 20 mol%<br>56.4 mg,              | 60 mol%<br>154.2 mg,               | 99                 | 1600           | 2000           | 1.3 |

|            |                       |                       |                         |    |      |      |     |
|------------|-----------------------|-----------------------|-------------------------|----|------|------|-----|
|            | 0.45 mmol             | 0.44 mmol             | 1.36 mmol               |    |      |      |     |
| 15-mer     | 40 mol%               | 0                     | 60 mol%                 | 96 | 1500 | 1700 | 1.1 |
| (T40%A0%)  | 114.4 mg,<br>0.9 mmol |                       | 154.2 mg,<br>1.36 mmol  |    |      |      |     |
| 15-mer     | 40 mol%               | 5 mol%                | 55 mol%                 | 95 | 1400 | 1500 | 1.1 |
| (T40%A5%)  | 114.4 mg,<br>0.9 mmol | 14.1 mg,<br>0.11 mmol | 141.35 mg,<br>1.25 mmol |    |      |      |     |
| 15-mer     | 40 mol%               | 10 mol%               | 50 mol%                 | 98 | 1600 | 2100 | 1.3 |
| (T40%A10%) | 114.4 mg,<br>0.9 mmol | 28.2 mg,<br>0.22 mmol | 129.0 mg,<br>1.14 mmol  |    |      |      |     |
| 15-mer     | 40 mol%               | 20 mol%               | 40 mol%                 | 98 | 1500 | 1800 | 1.2 |
| (T40%A20%) | 114.4 mg,<br>0.9 mmol | 56.4 mg,<br>0.44 mmol | 102.8 mg,<br>0.91 mmol  |    |      |      |     |

### 3. $^1\text{H}$ NMR of polymer ligands in MeOD

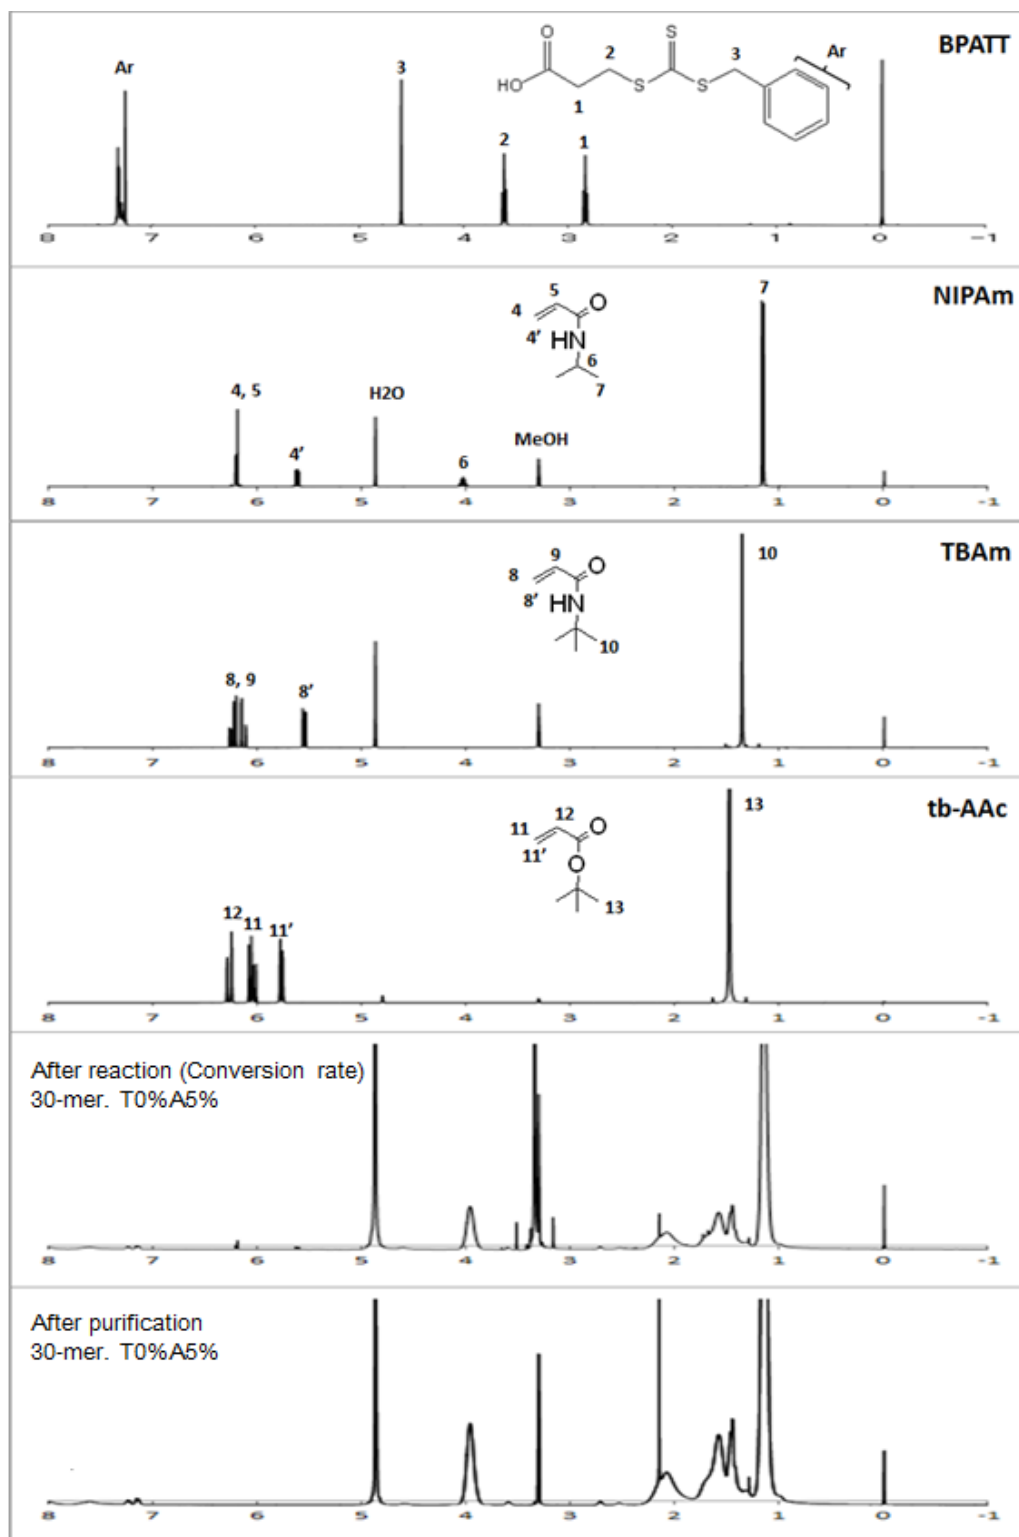

**Figure S1-2.**  $^1\text{H}$  NMR of 30-mer PL, containing 0 % TBAm and 5 % *tb*-AAc

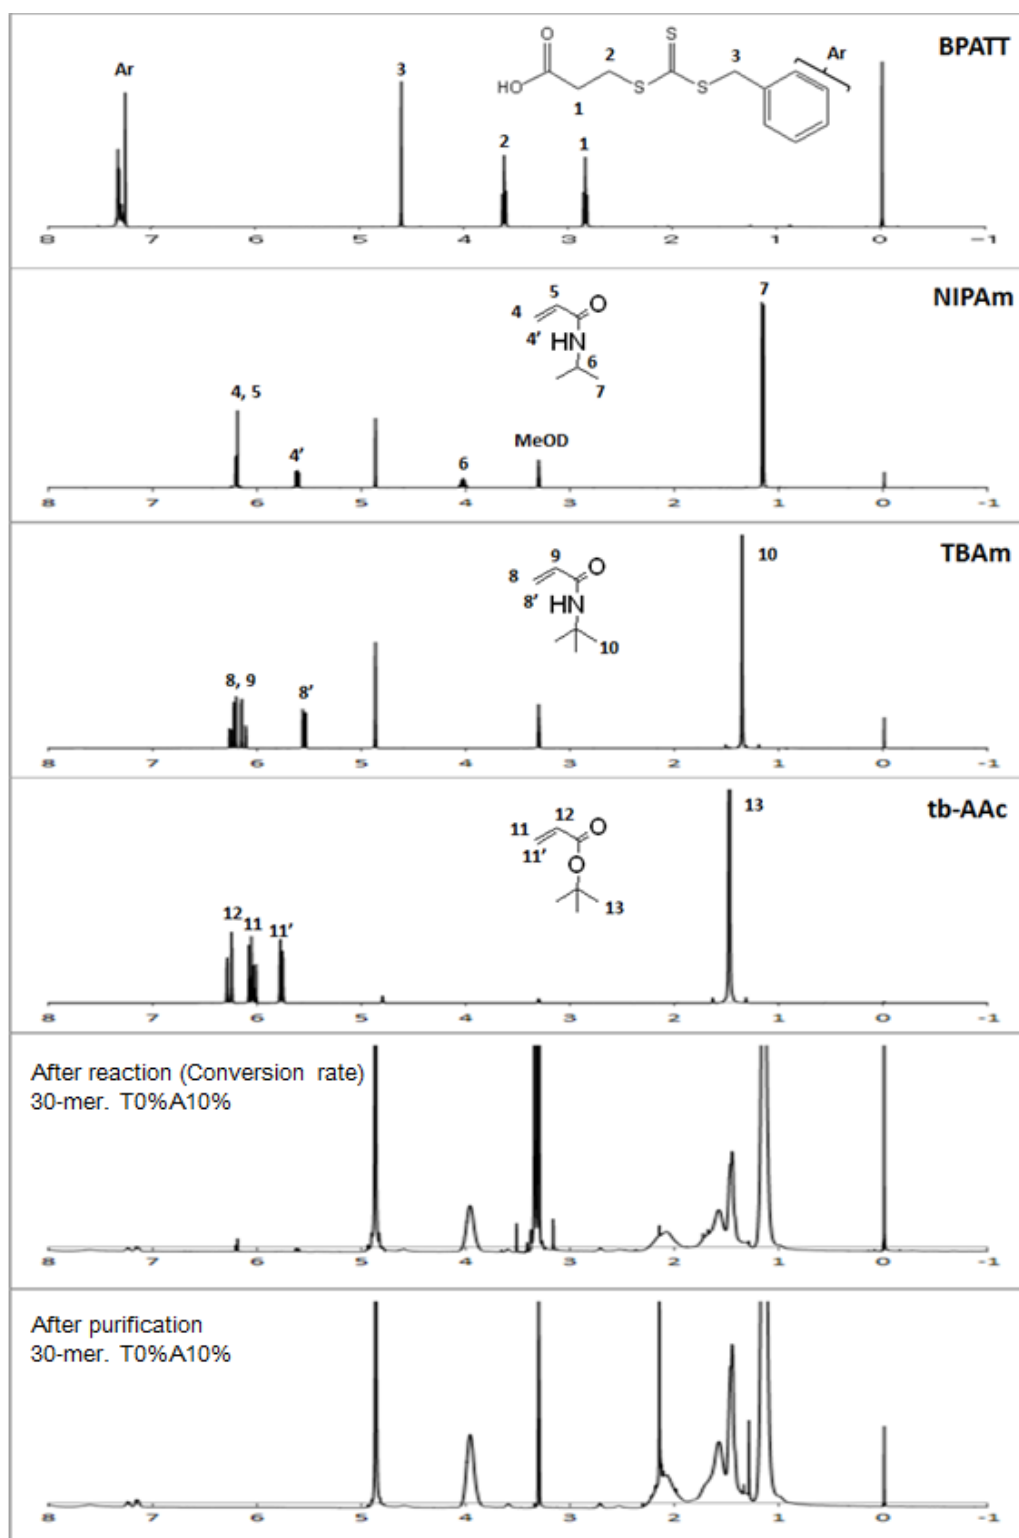

**Figure S1-3.**  $^1\text{H}$  NMR of 30-mer PL, containing 0 % TBAm and 10 % *tb*-AAc

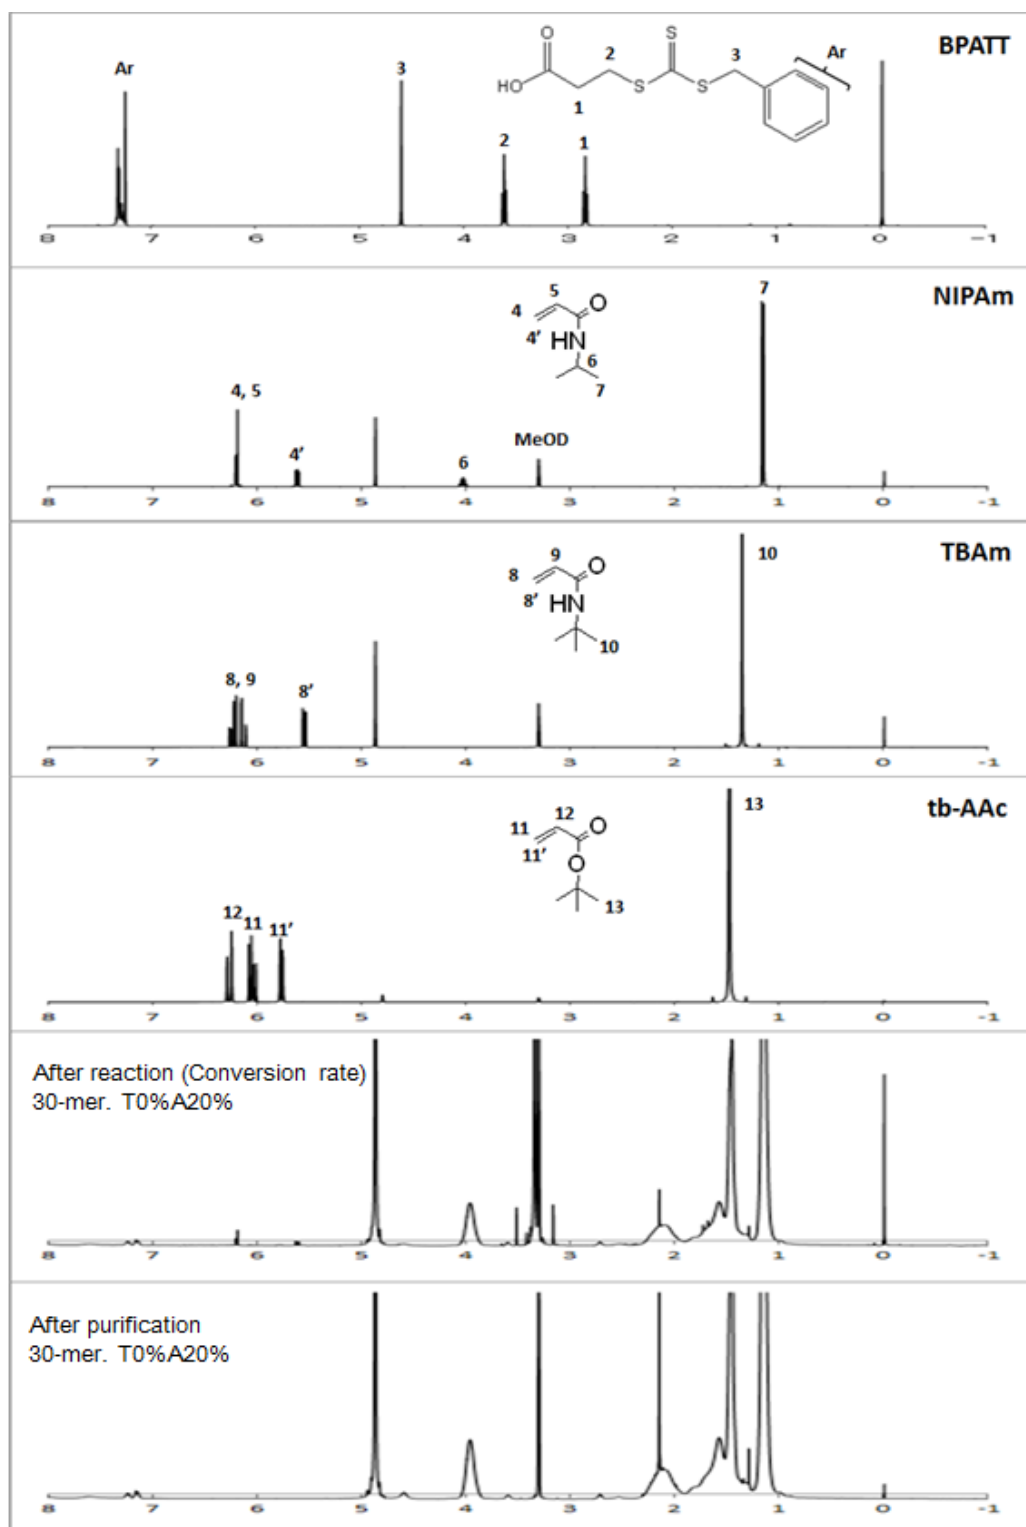

**Figure S1-4.**  $^1\text{H}$  NMR of 30-mer PL, containing 0 % TBAm and 20 % *tb*-AAc



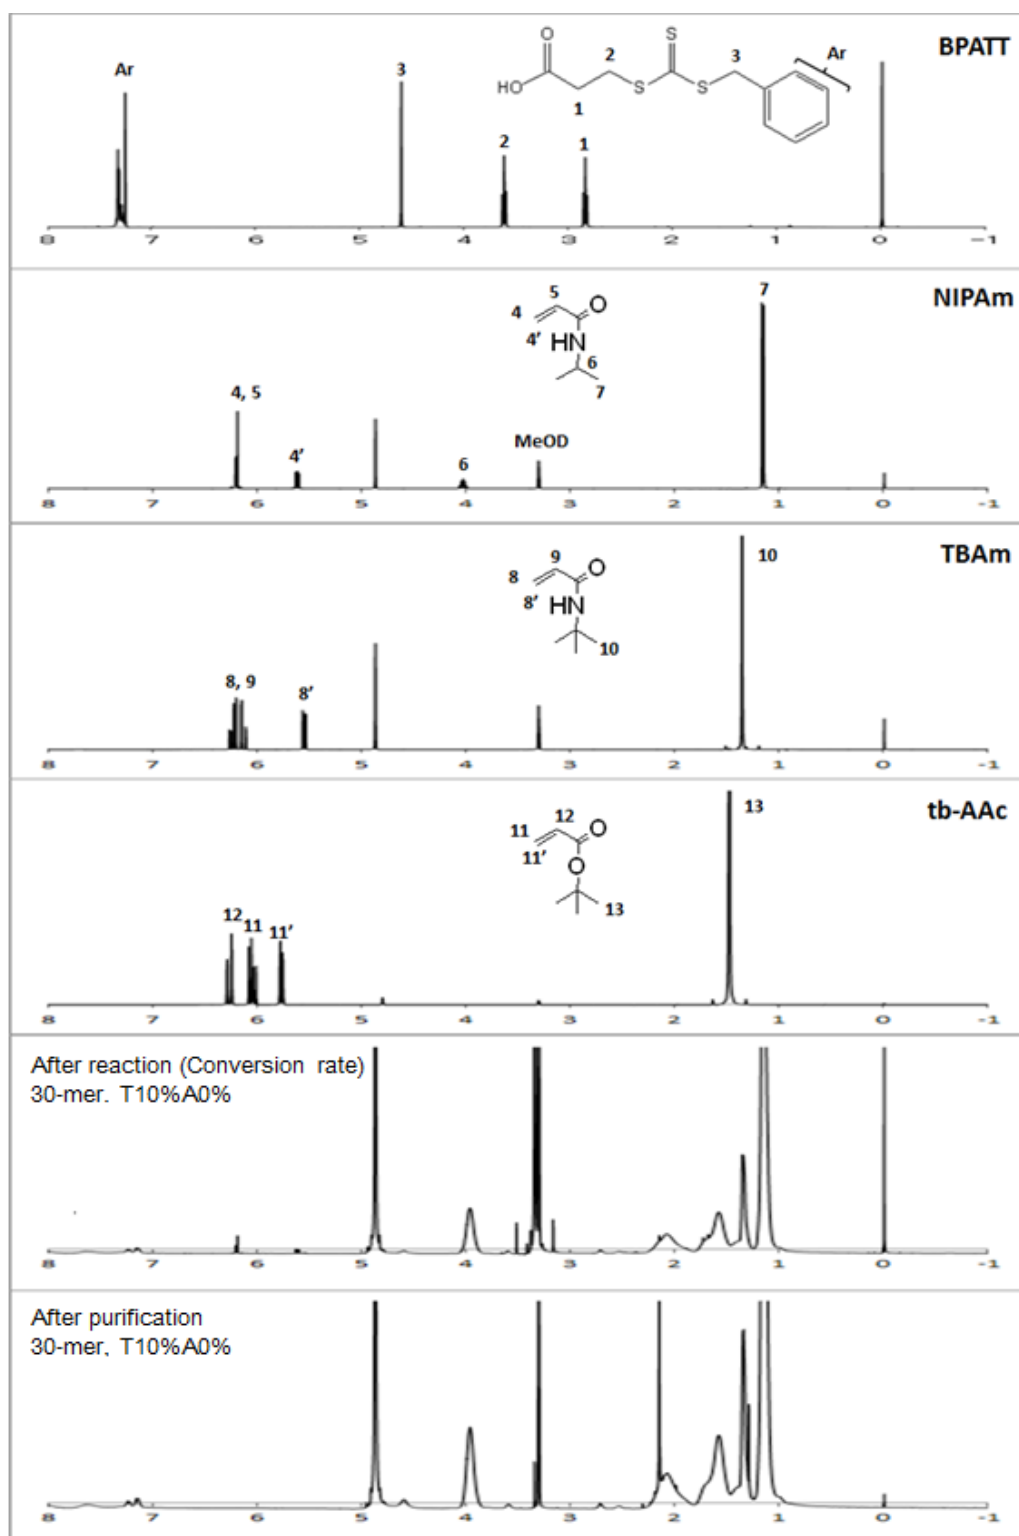

**Figure S1-5.**  $^1\text{H}$  NMR of 30-mer PL, containing 10 % TBAm and 0 % *tb*-AAc

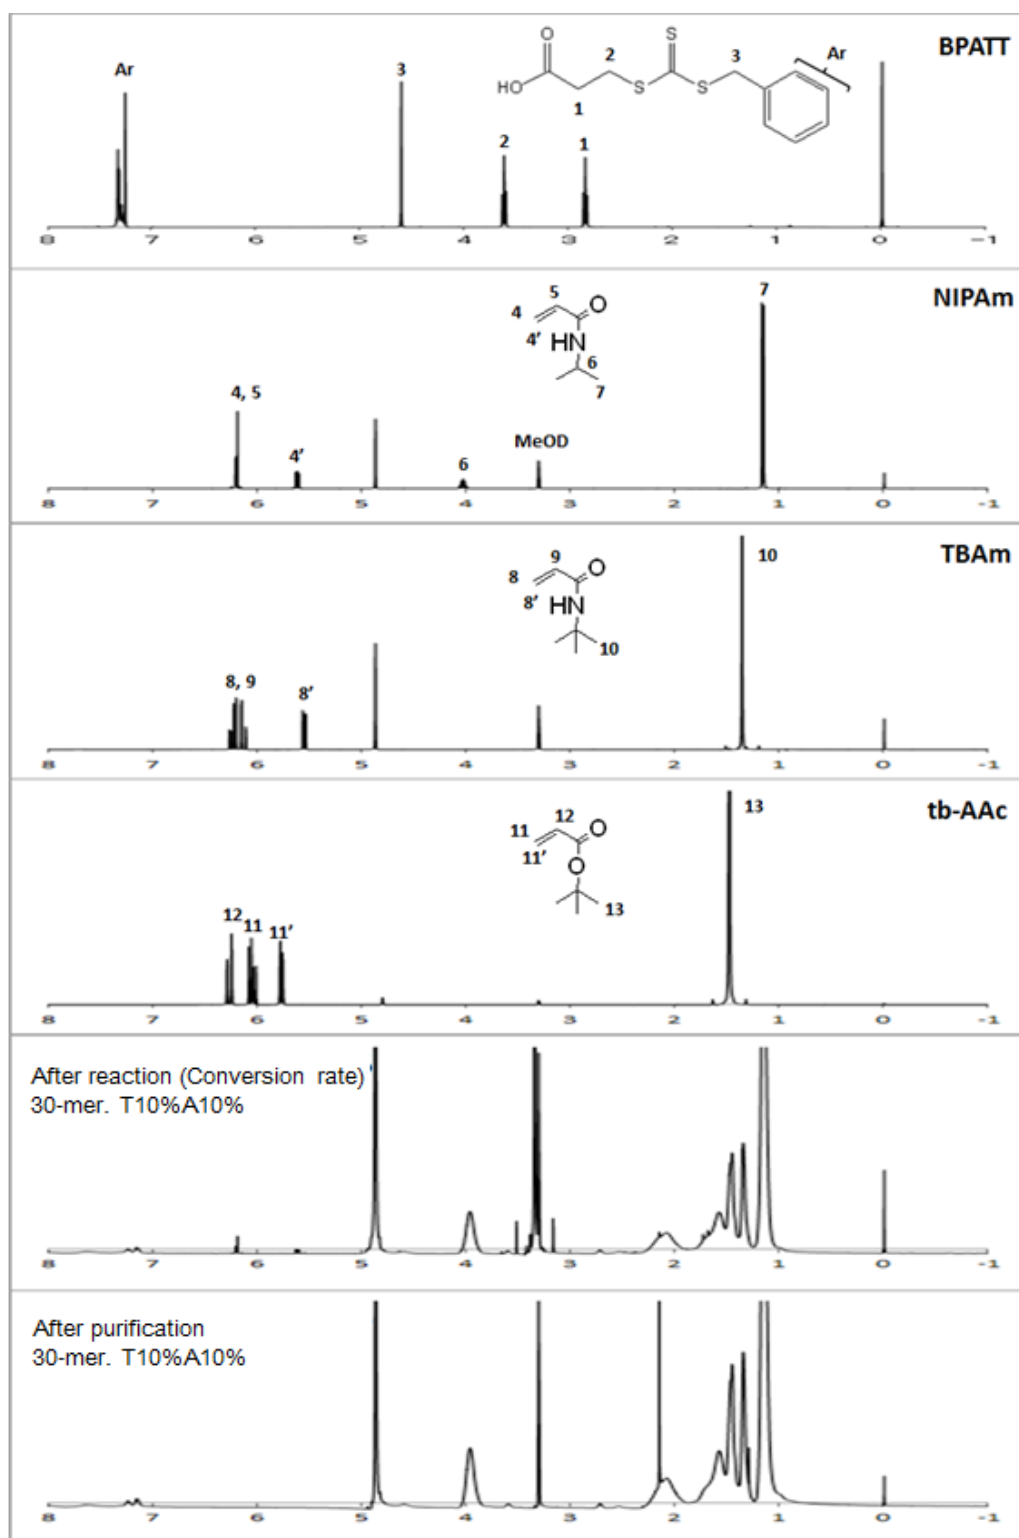

**Figure S1-6.**  $^1\text{H}$  NMR of 30-mer PL, containing 10 % TBAm and 10 % *tb*-AAc

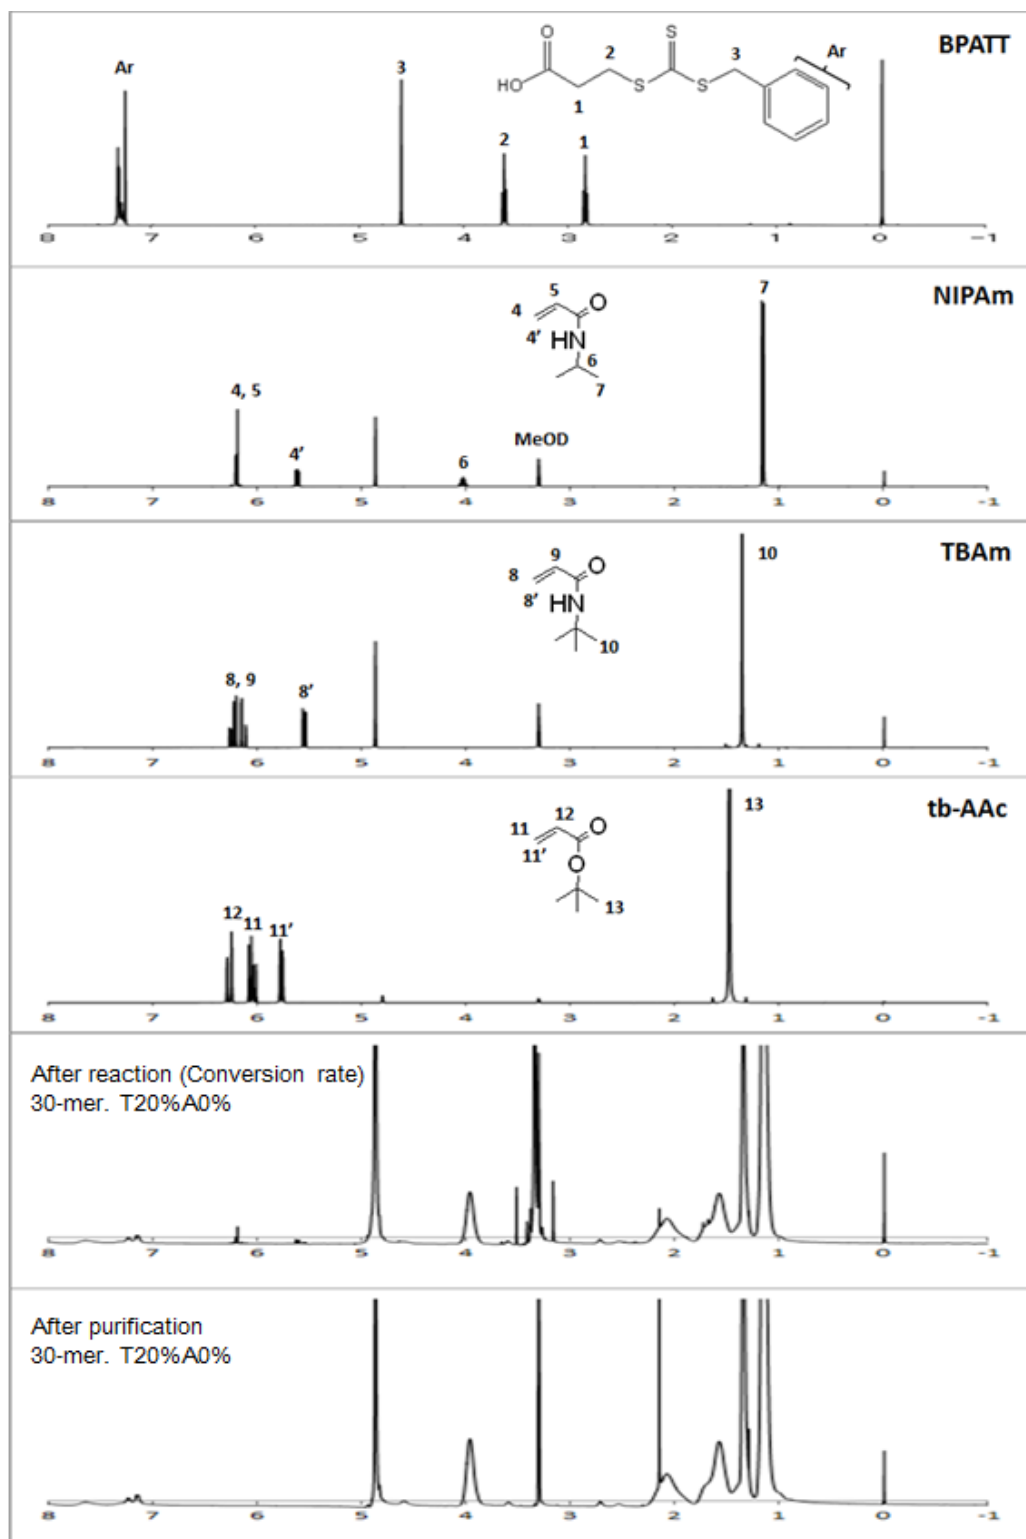

**Figure S1-7.**  $^1\text{H}$  NMR of 30-mer PL, containing 20 % TBAm and 0 % *tb*-AAc

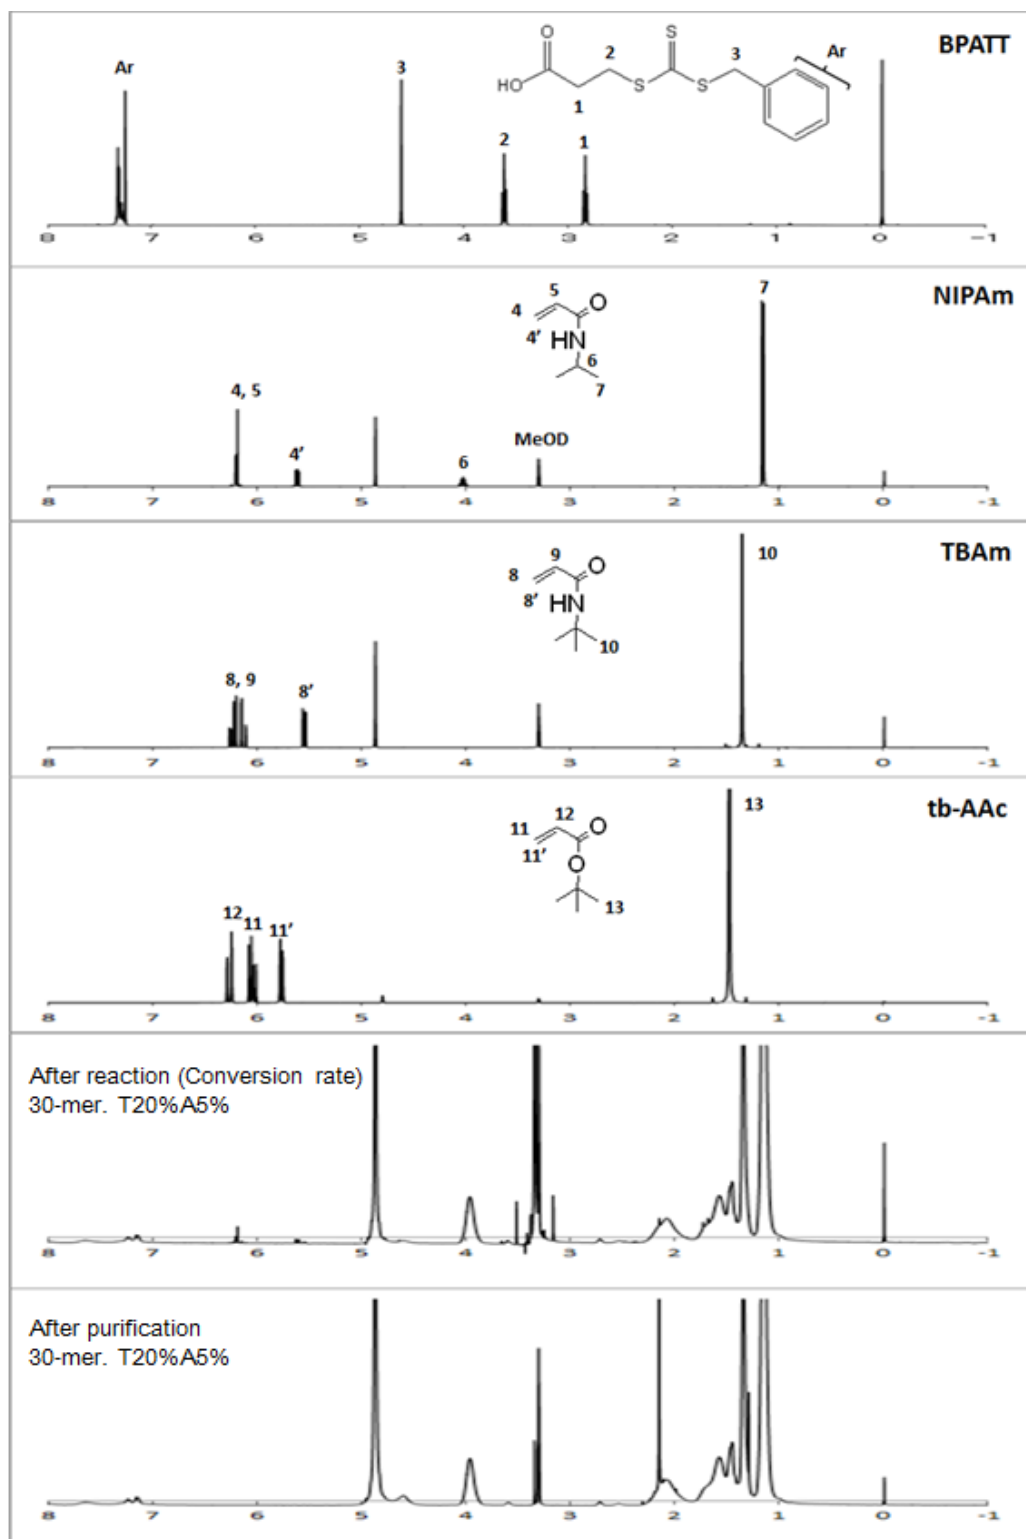

**Figure S1-8.**  $^1\text{H}$  NMR of 30-mer PL, containing 20 % TBAm and 5 % *tb*-AAc

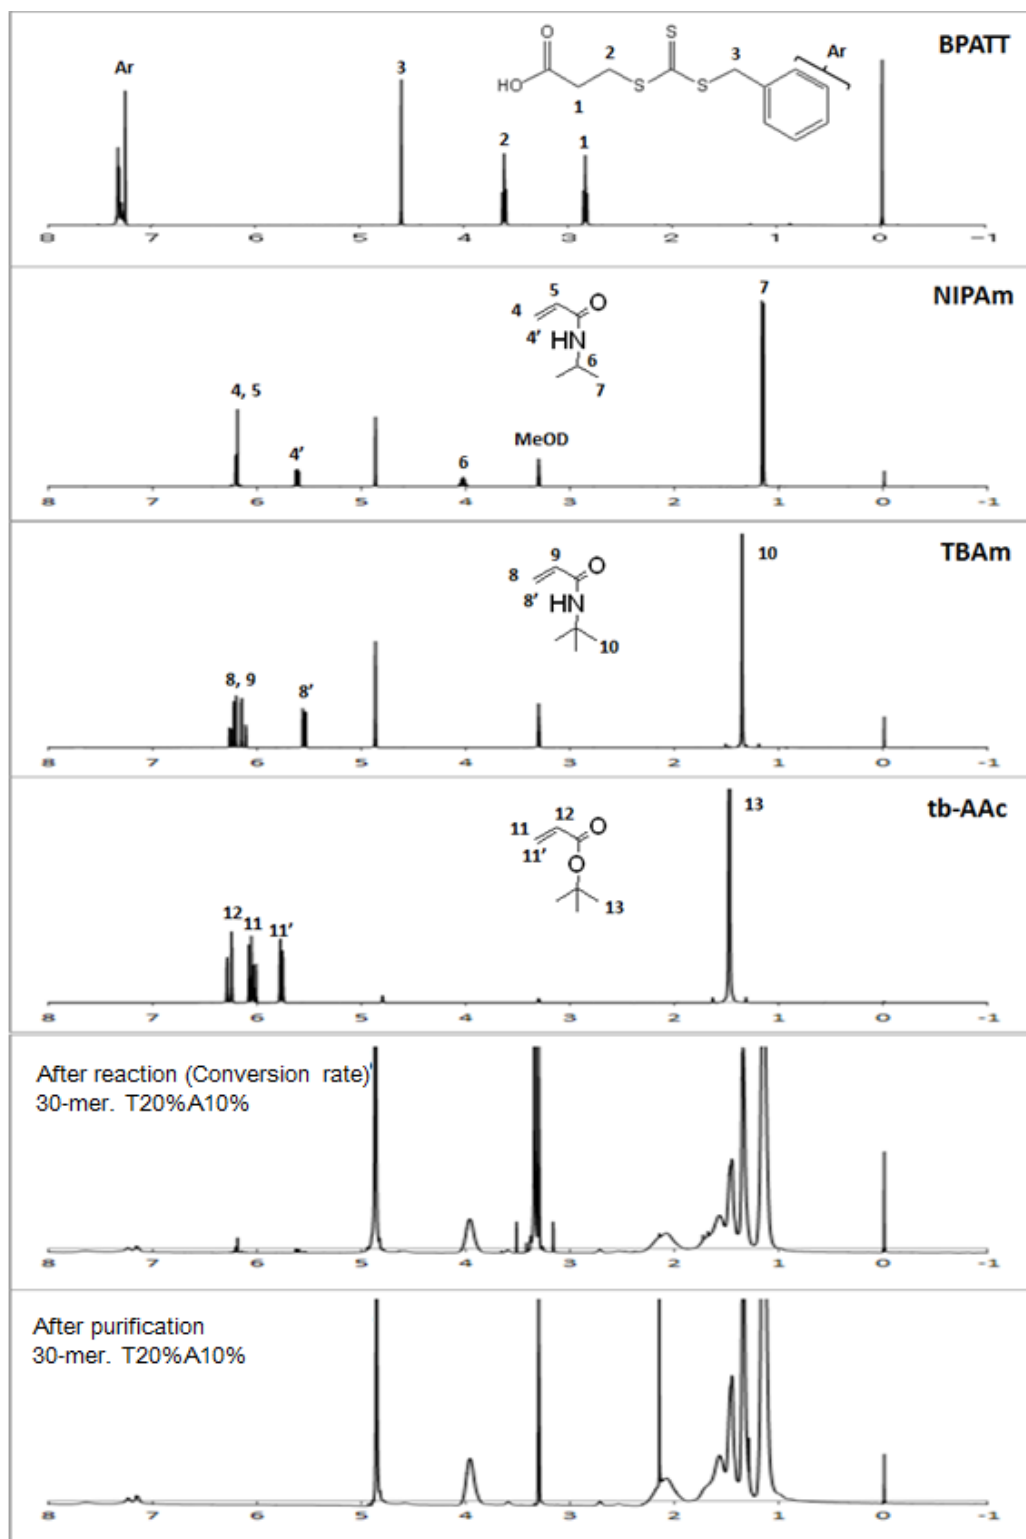

**Figure S1-9.**  $^1\text{H}$  NMR of 30-mer PL, containing 20 % TBAm and 10 % *tb*-AAc

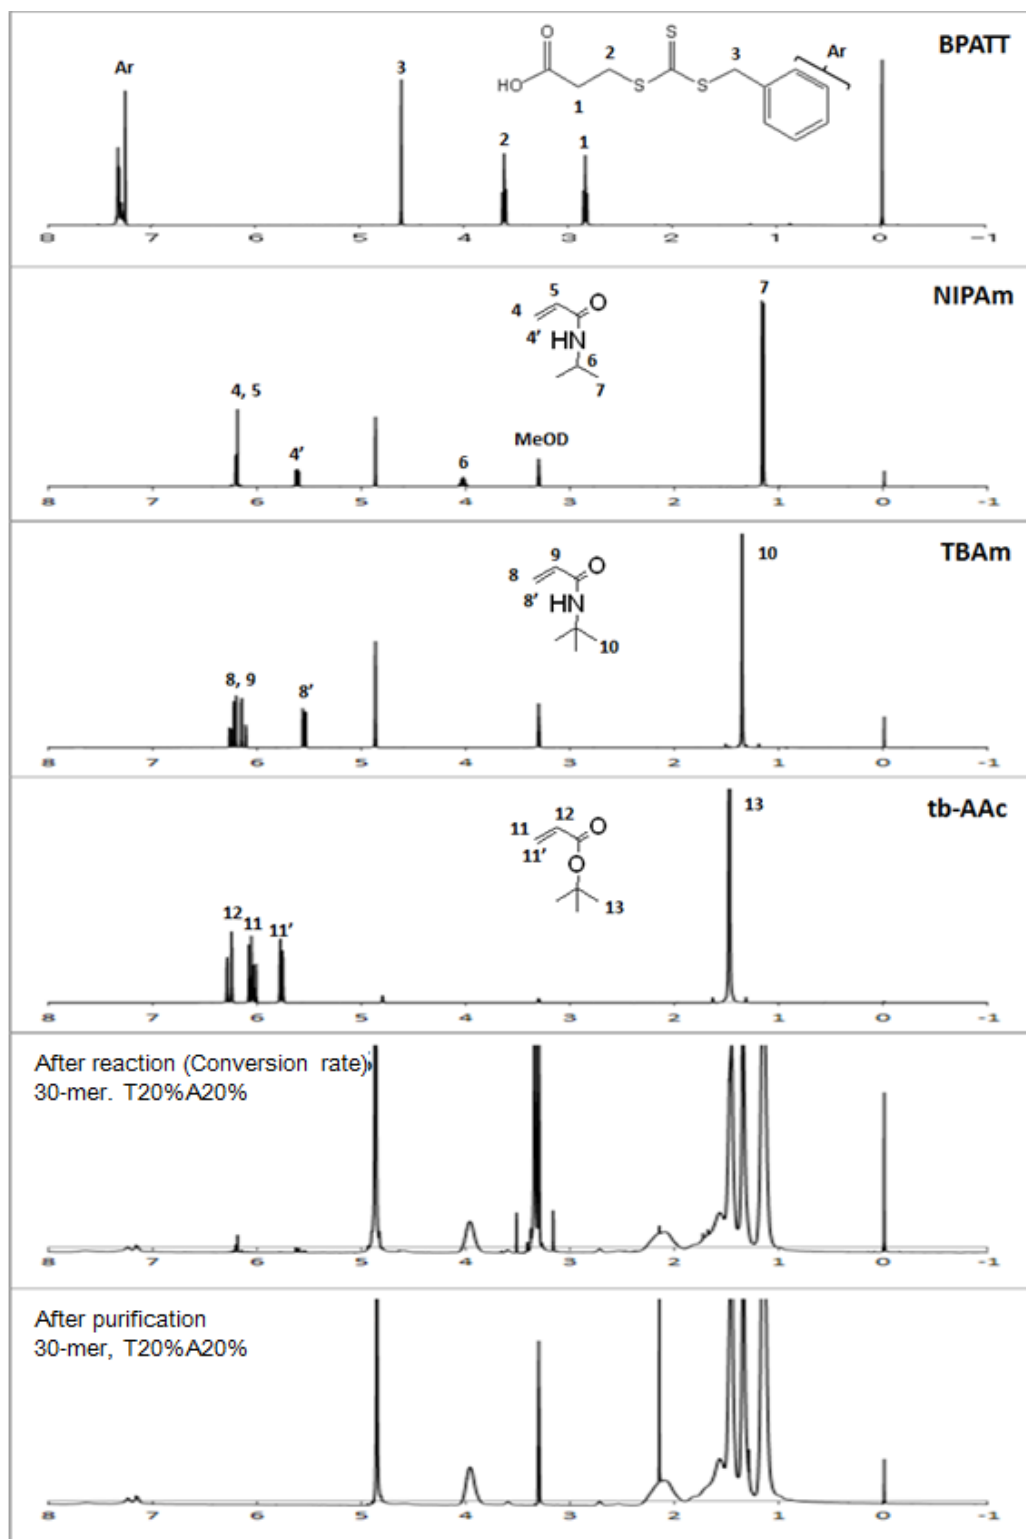

**Figure S1-10.**  $^1\text{H}$  NMR of 30-mer PL, containing 20 % TBAm and 20 % *tb*-AAc

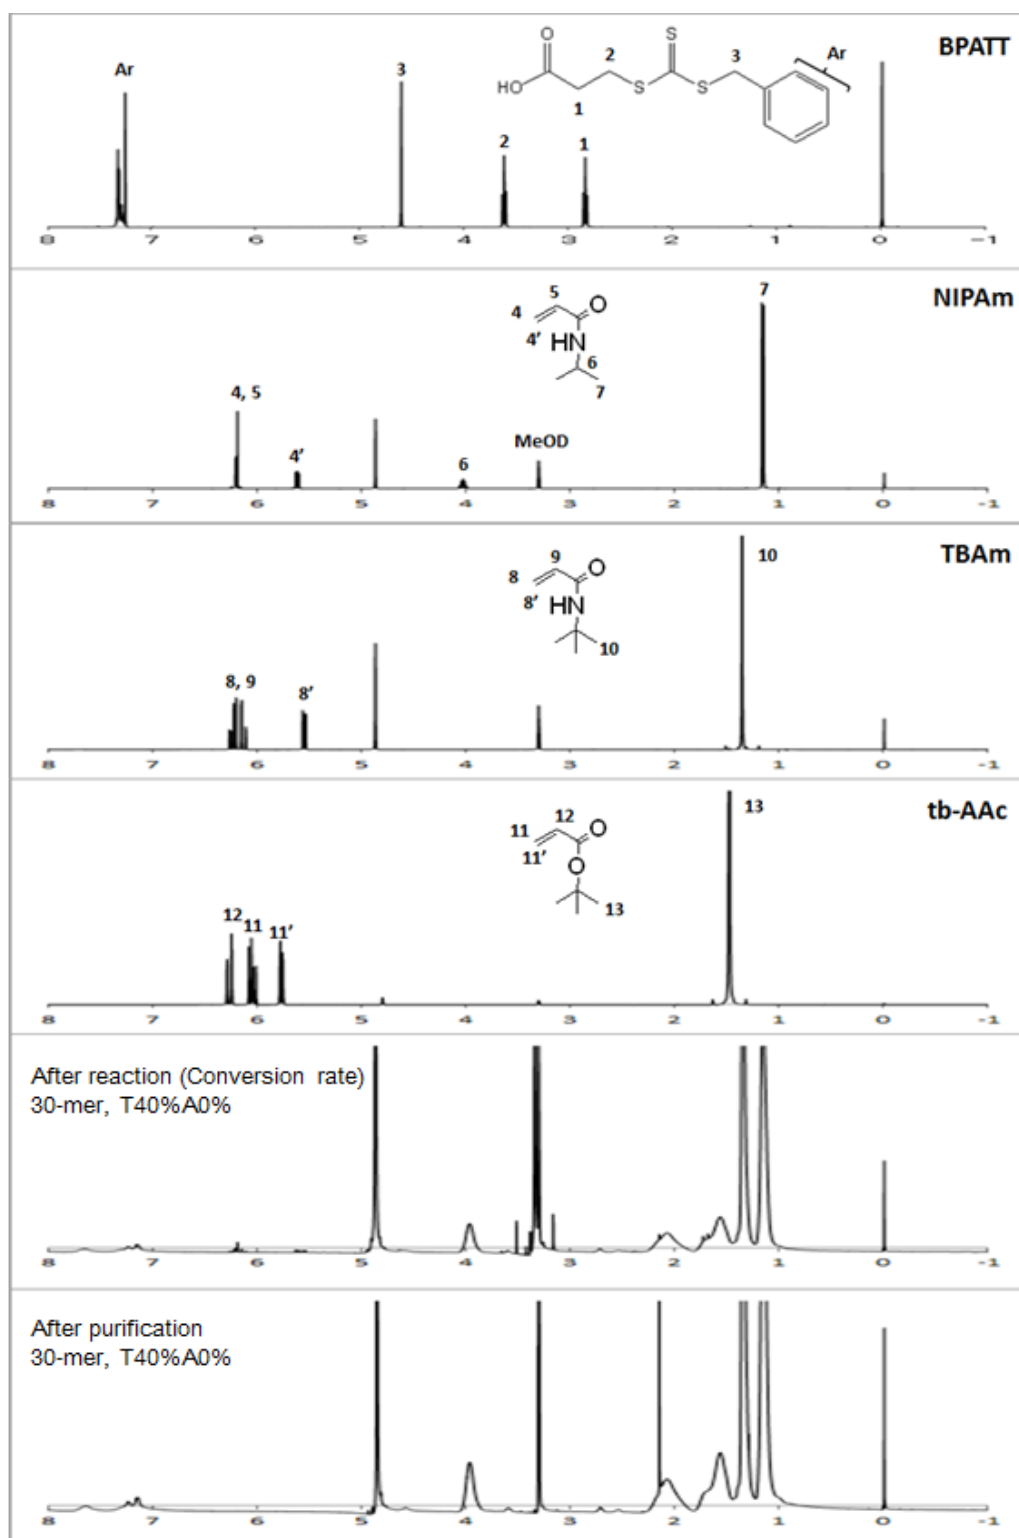

**Figure S1-11.**  $^1\text{H}$  NMR of 30-mer PL, containing 40 % TBAm and 0 % *tb*-AAc

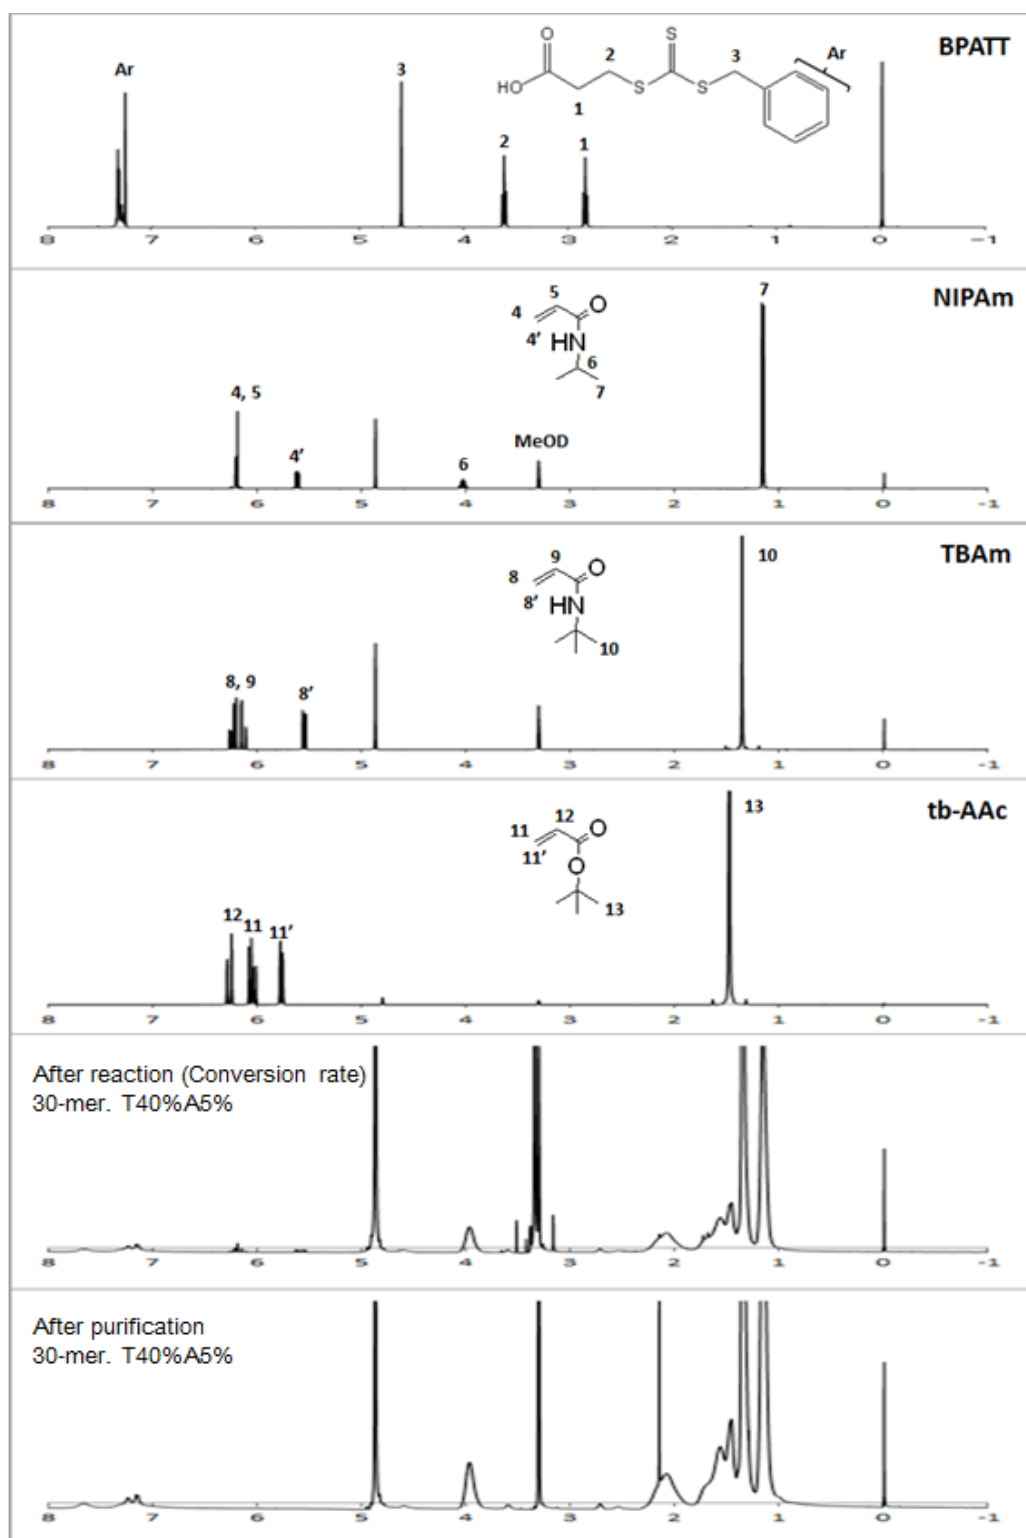

**Figure S1-12.**  $^1\text{H}$  NMR of 30-mer PL, containing 40 % TBAm and 5 % *tb*-AAc



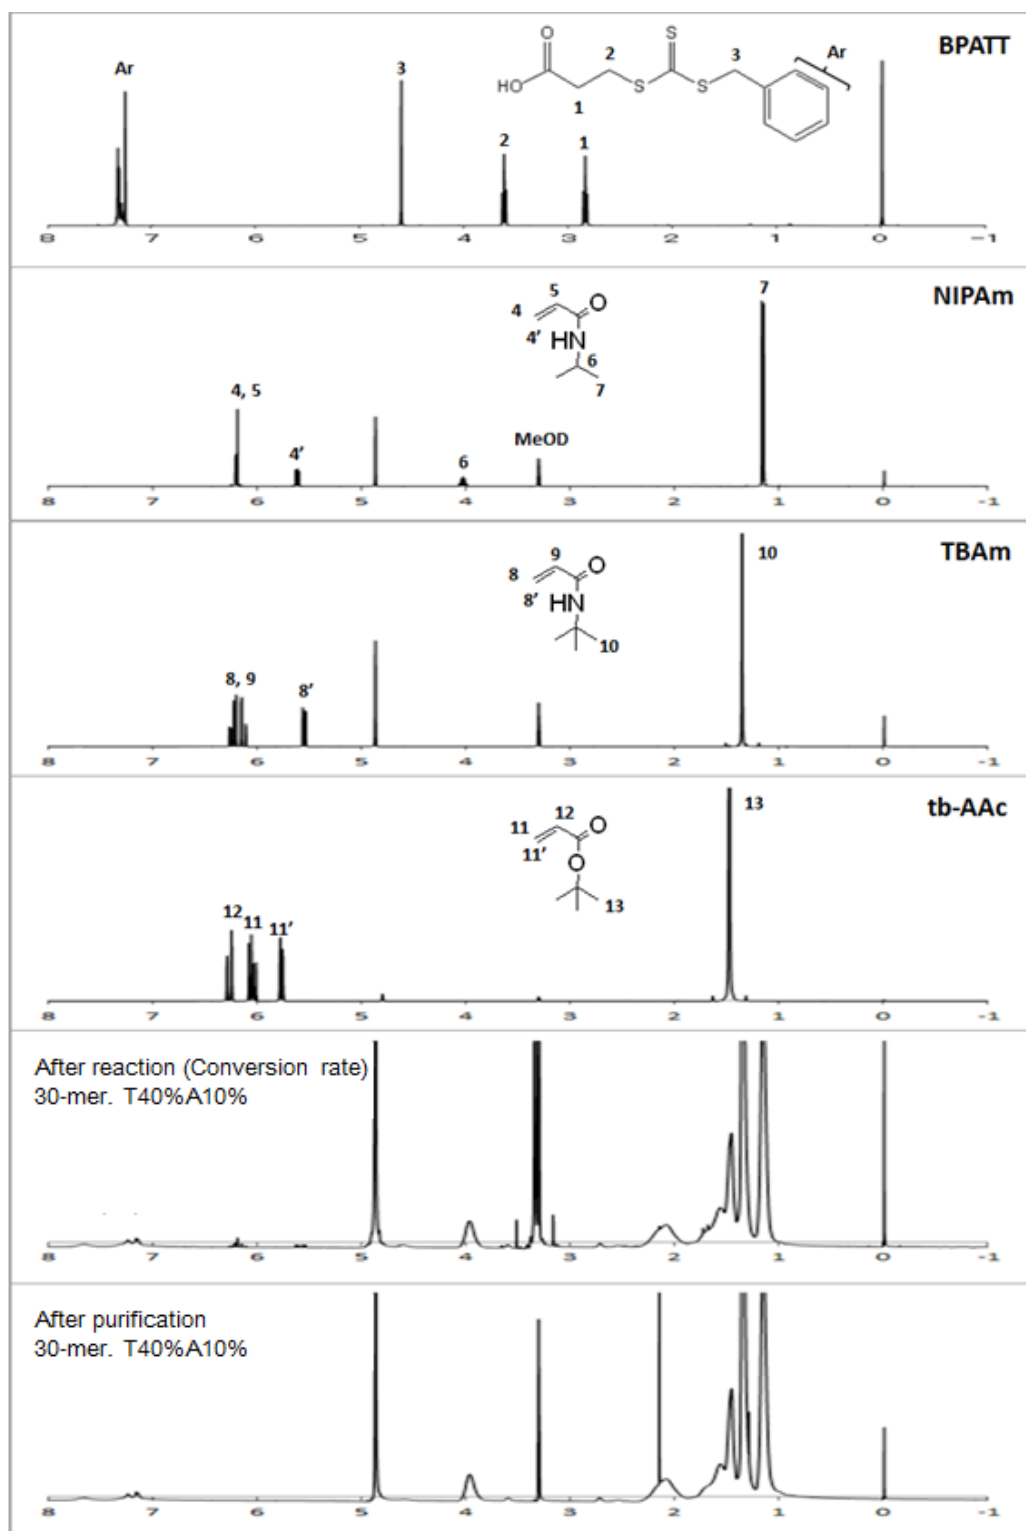

**Figure S1-13.**  $^1\text{H}$  NMR of 30-mer PL, containing 40 % TBAm and 10 % *tb*-AAc

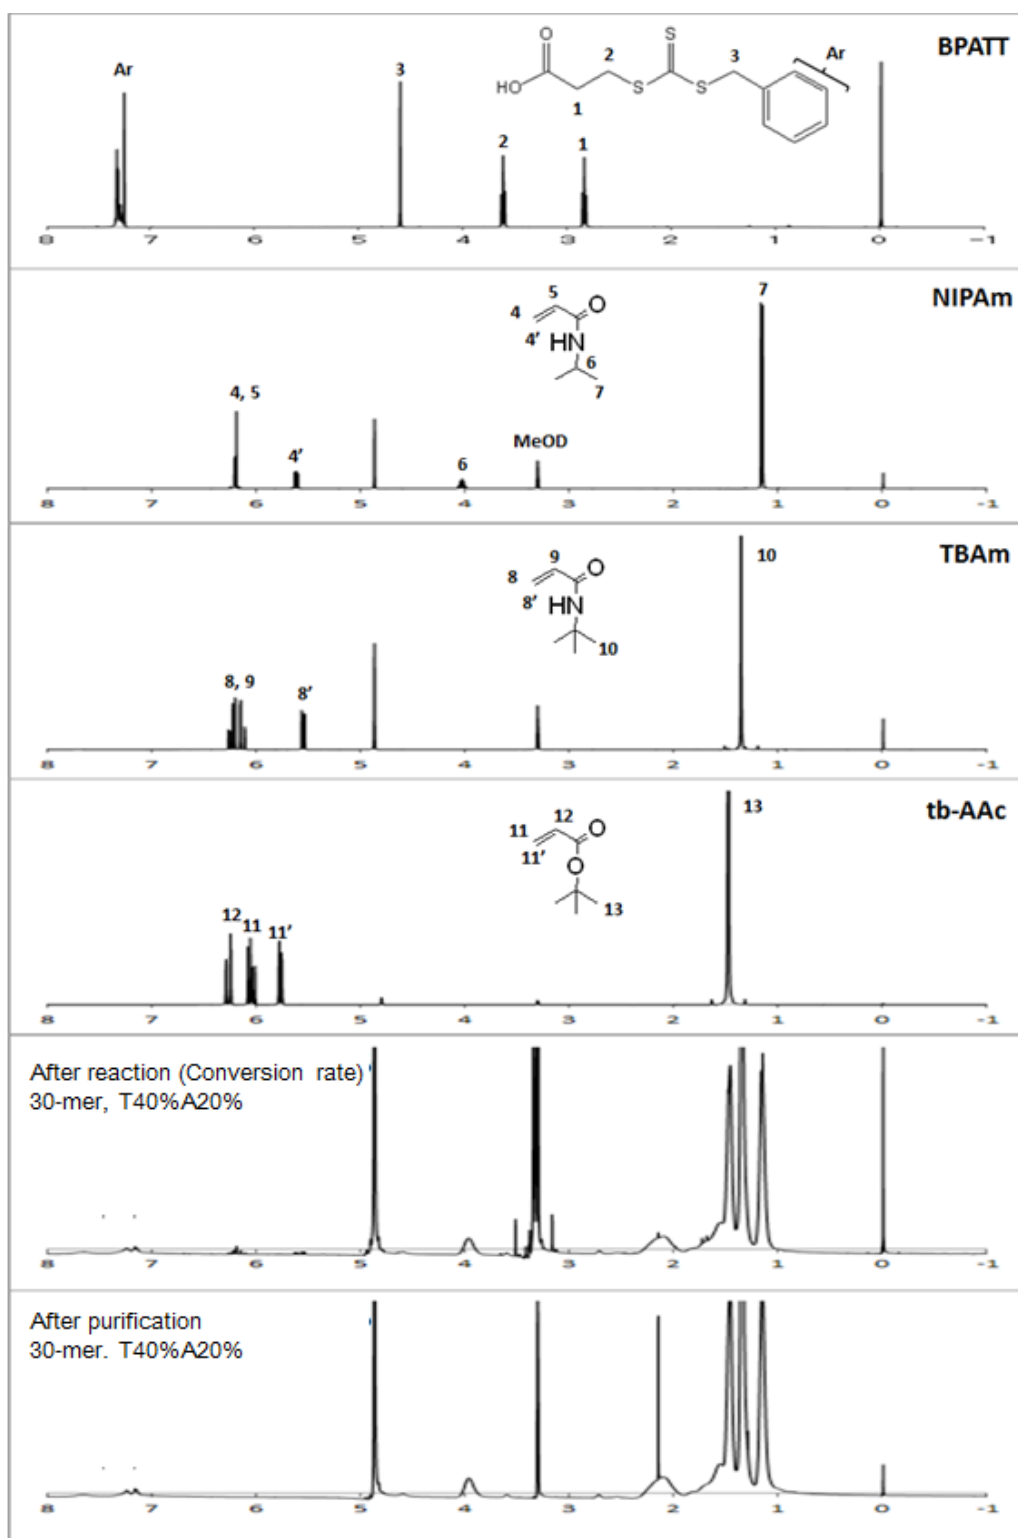

**Figure S1-14.**  $^1\text{H}$  NMR of 30-mer PL, containing 40 % TBAm and 20 % *tb*-AAc

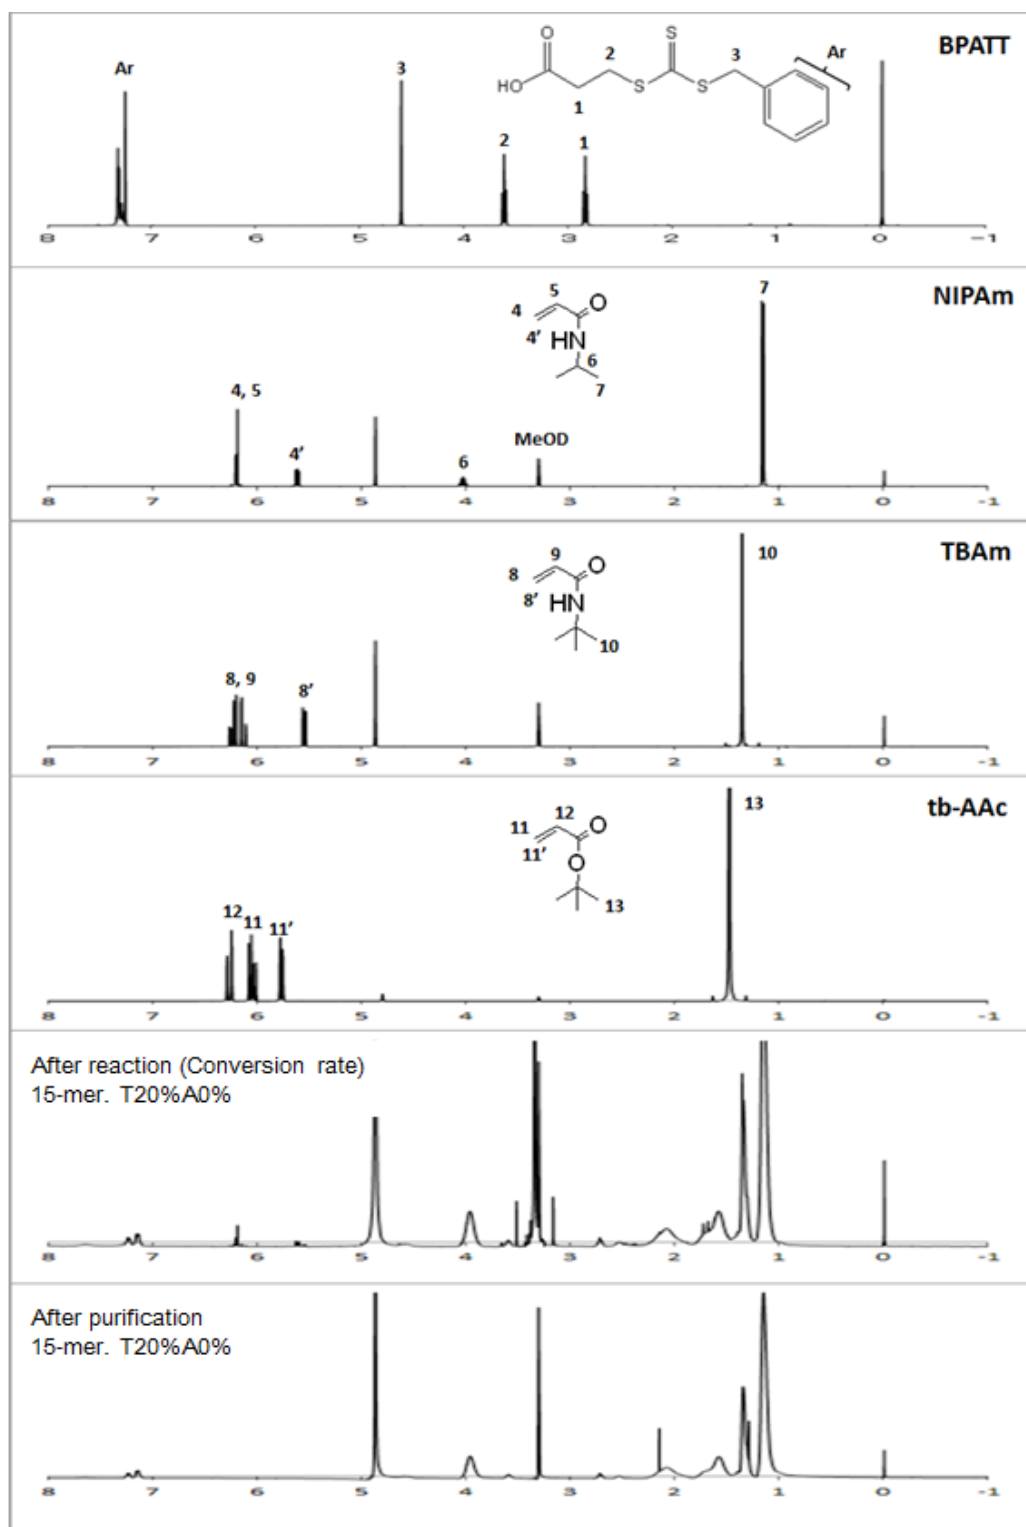

**Figure S1-15.**  $^1\text{H}$  NMR of 15-mer PL, containing 20 % TBAm and 0 % *tb*-AAc

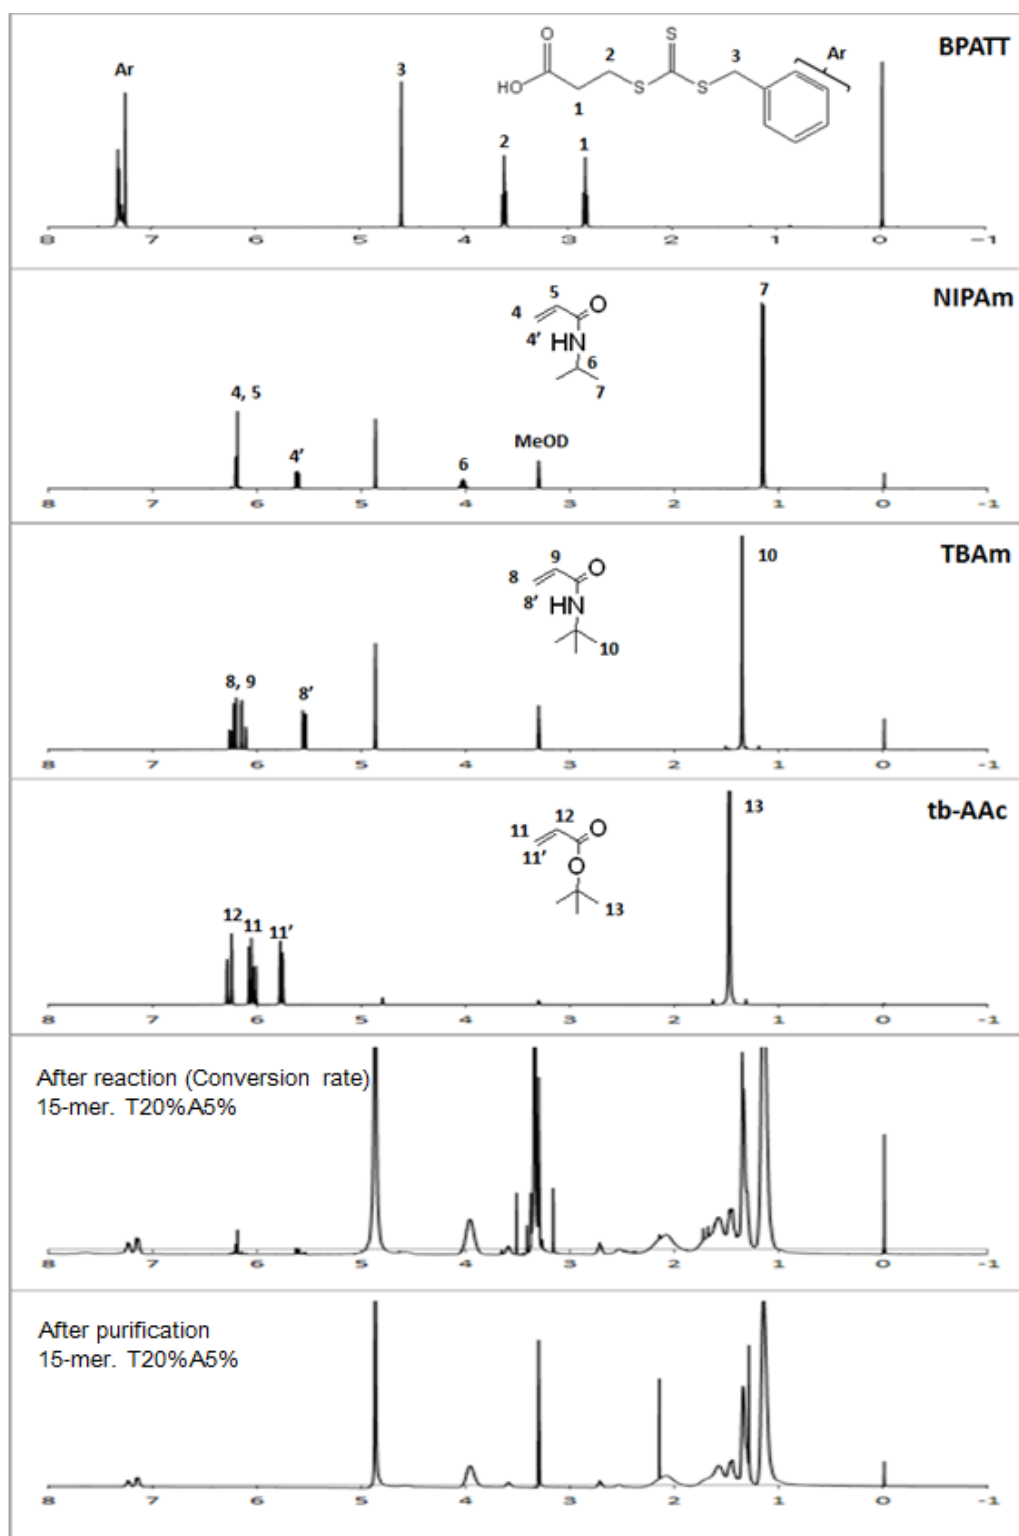

**Figure S1-16.**  $^1\text{H}$  NMR of 15-mer PL, containing 20 % TBAm and 5 % *tb*-AAc

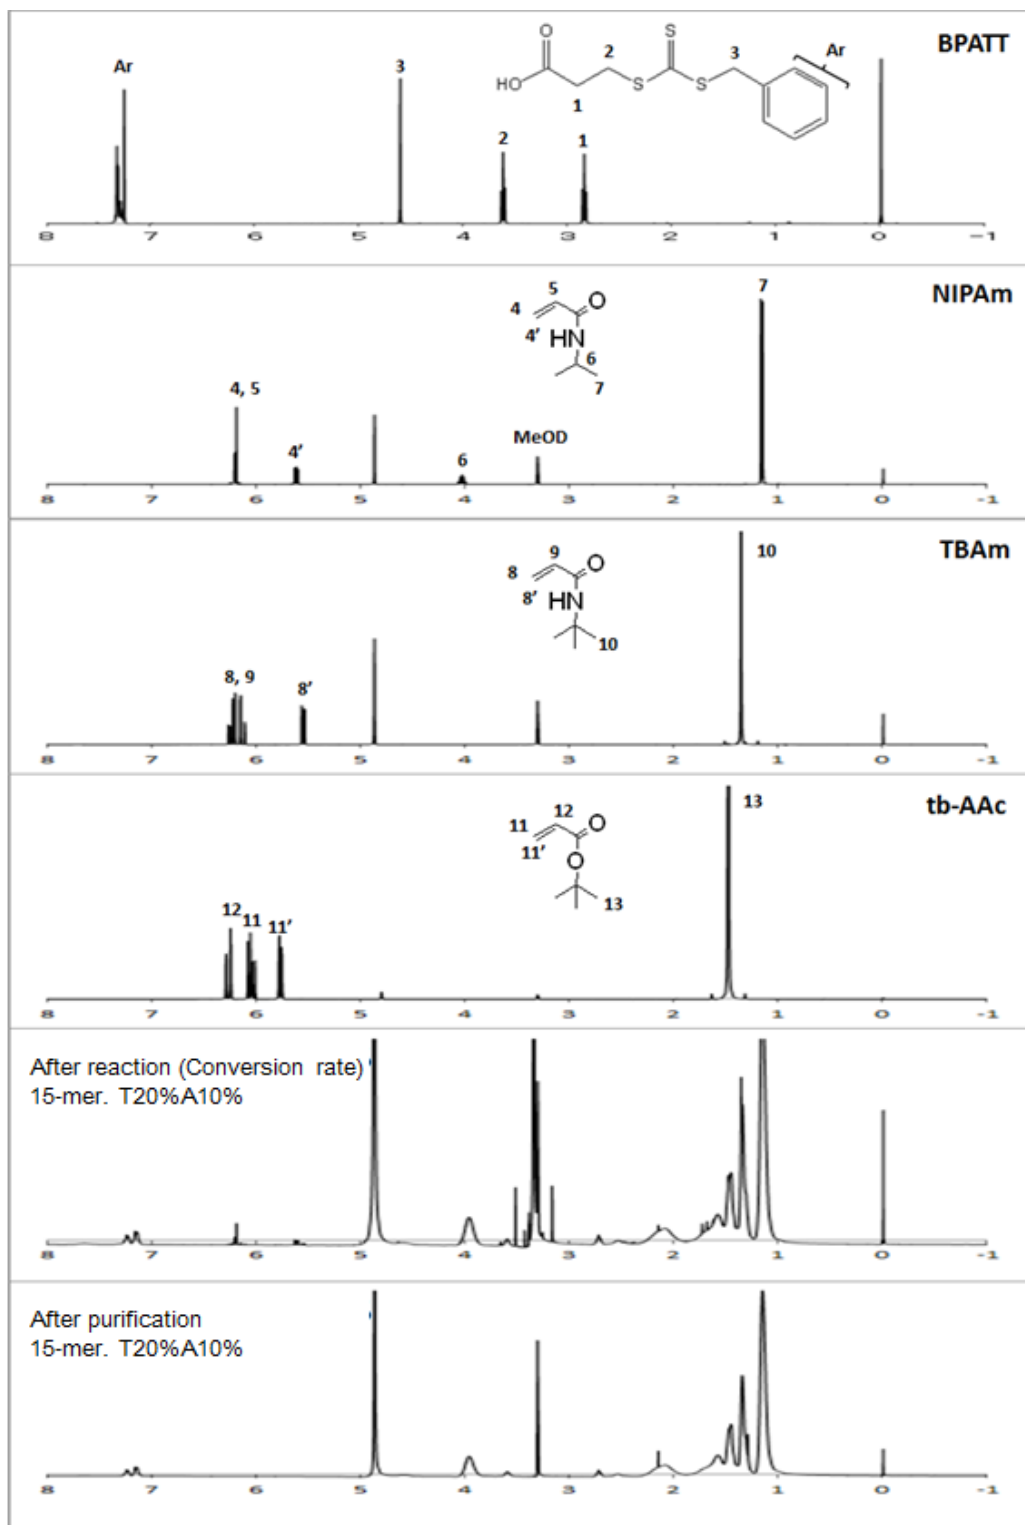

**Figure S1-17.**  $^1\text{H}$  NMR of 15-mer PL, containing 20 % TBAm and 10 % *tb*-AAc

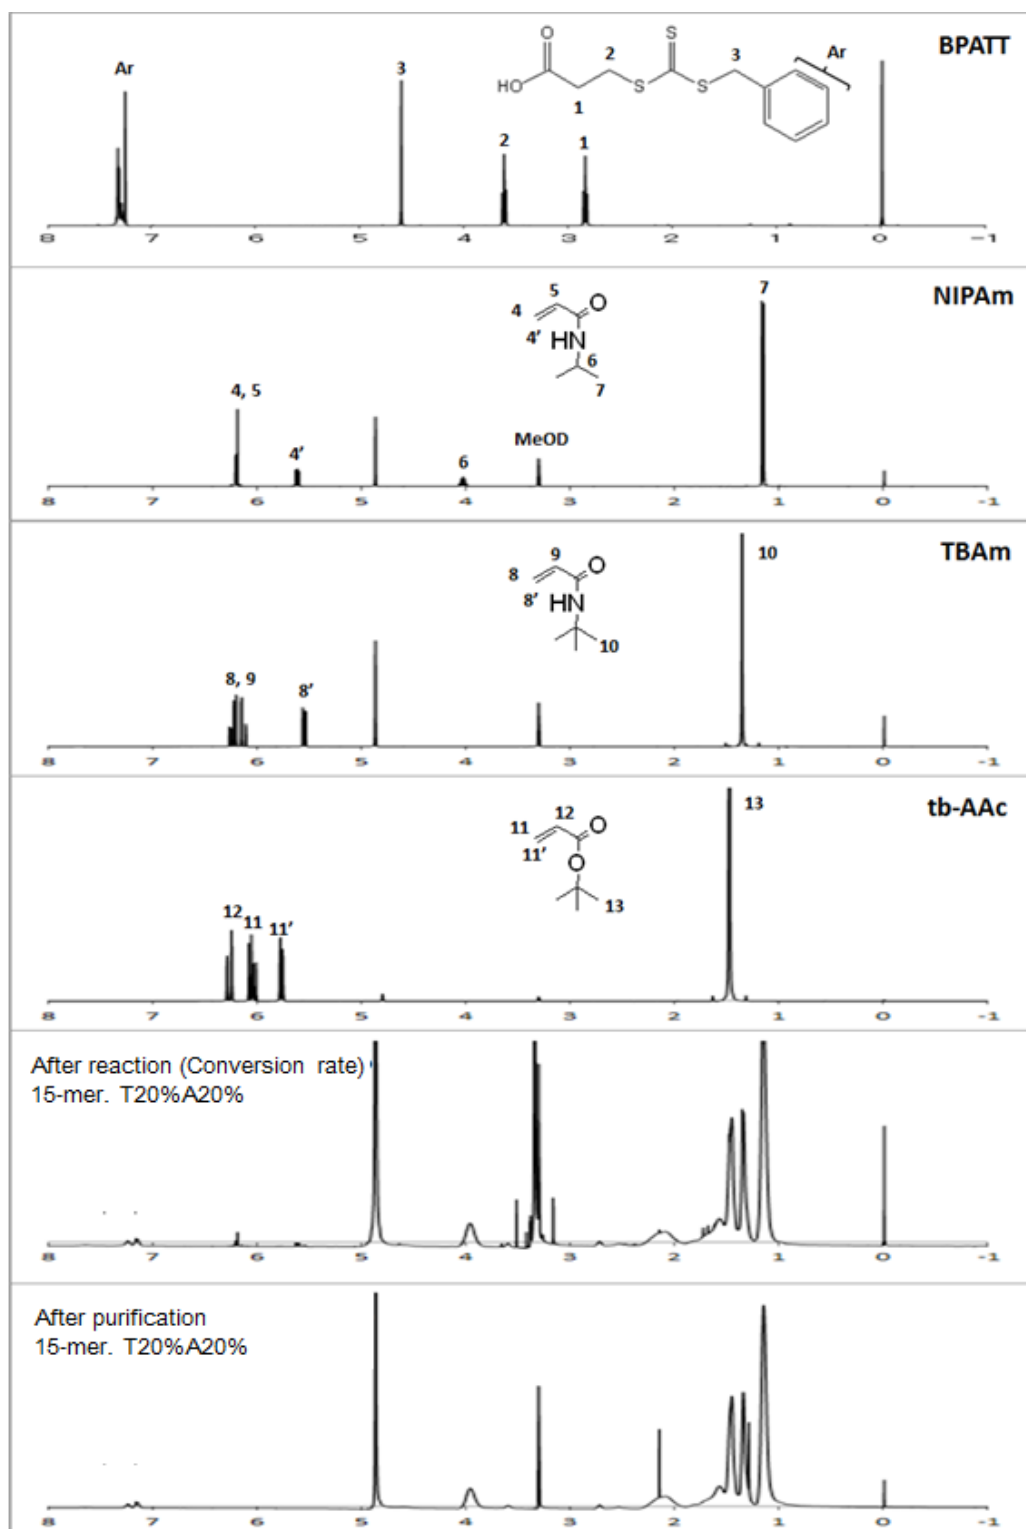

**Figure S1-18.**  $^1\text{H}$  NMR of 15-mer PL, containing 20 % TBAm and 20 % *tb*-AAc

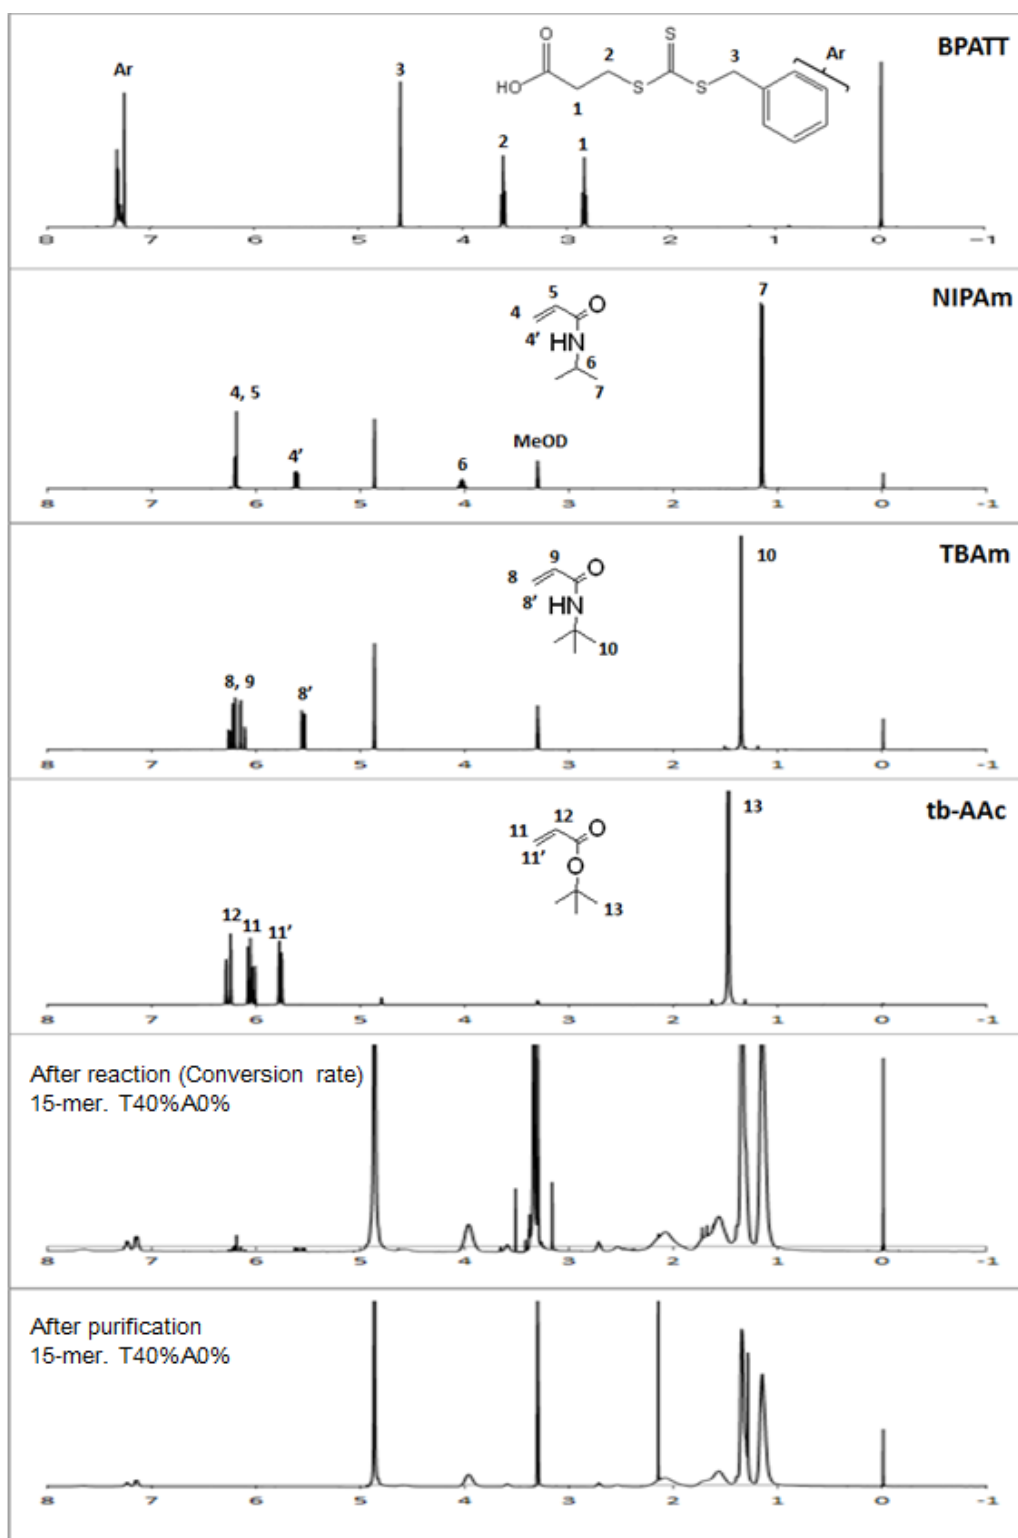

**Figure S1-19.**  $^1\text{H}$  NMR of 15-mer PL, containing 40 % TBAm and 0 % *tb*-AAc

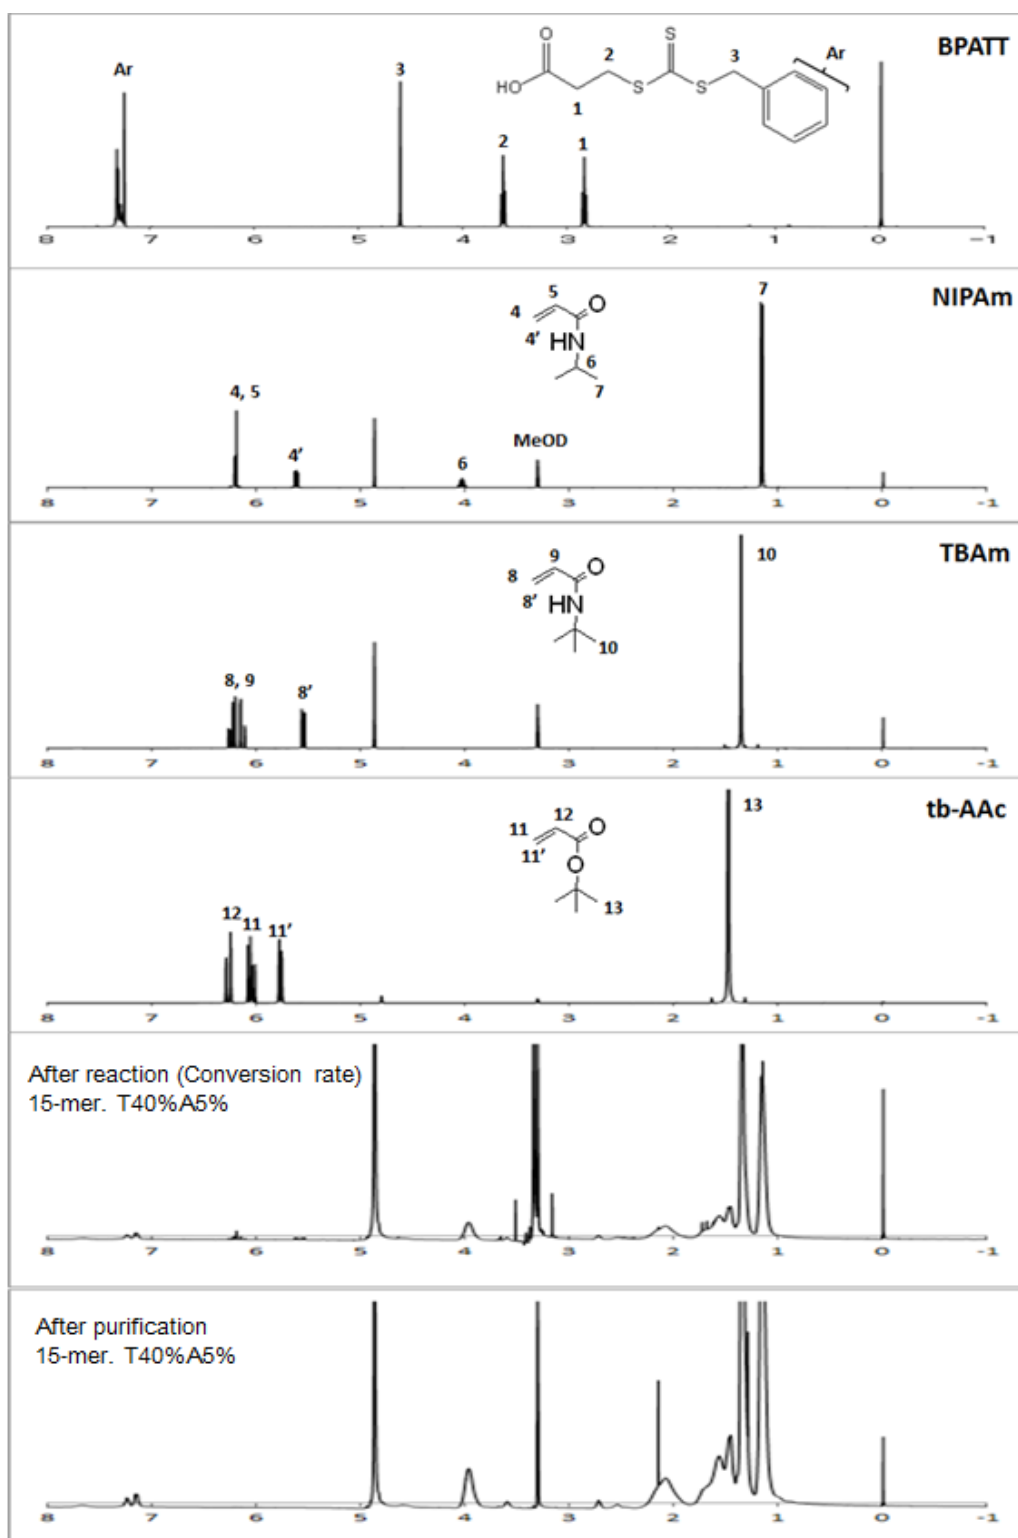

**Figure S1-20**  $^1\text{H}$  NMR of 15-mer PL, containing 40 % TBAm and 5 % *tb*-AAc



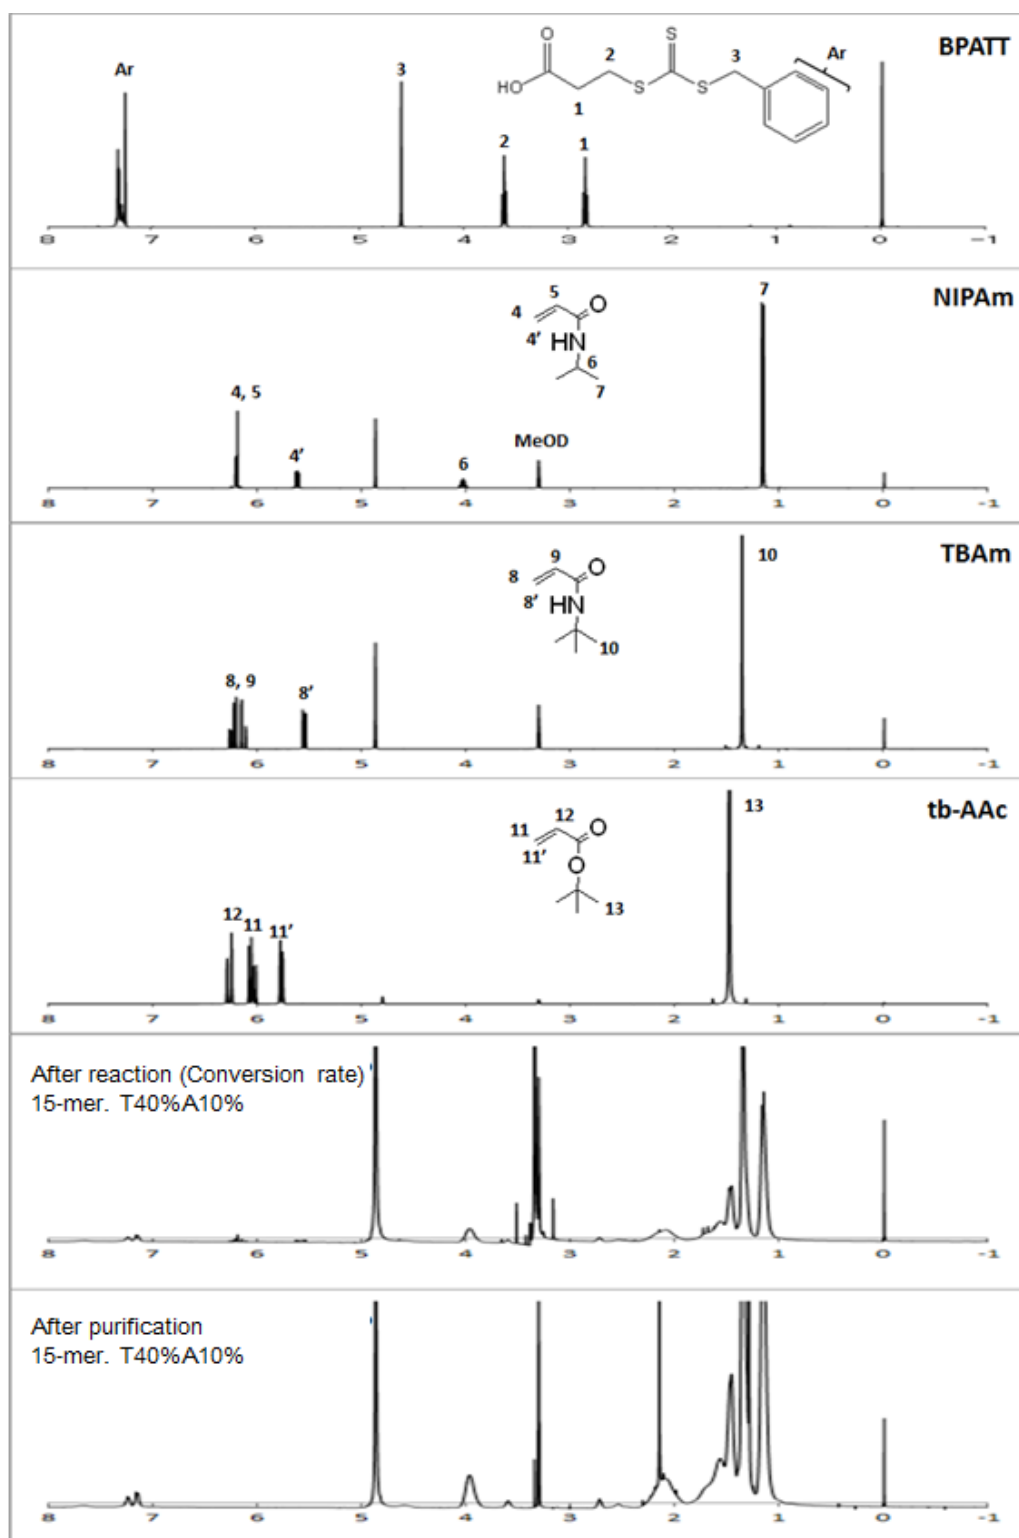

**Figure S1-21.**  $^1\text{H}$  NMR of 15-mer PL, containing 40 % TBAm and 10 % *tb*-AAc

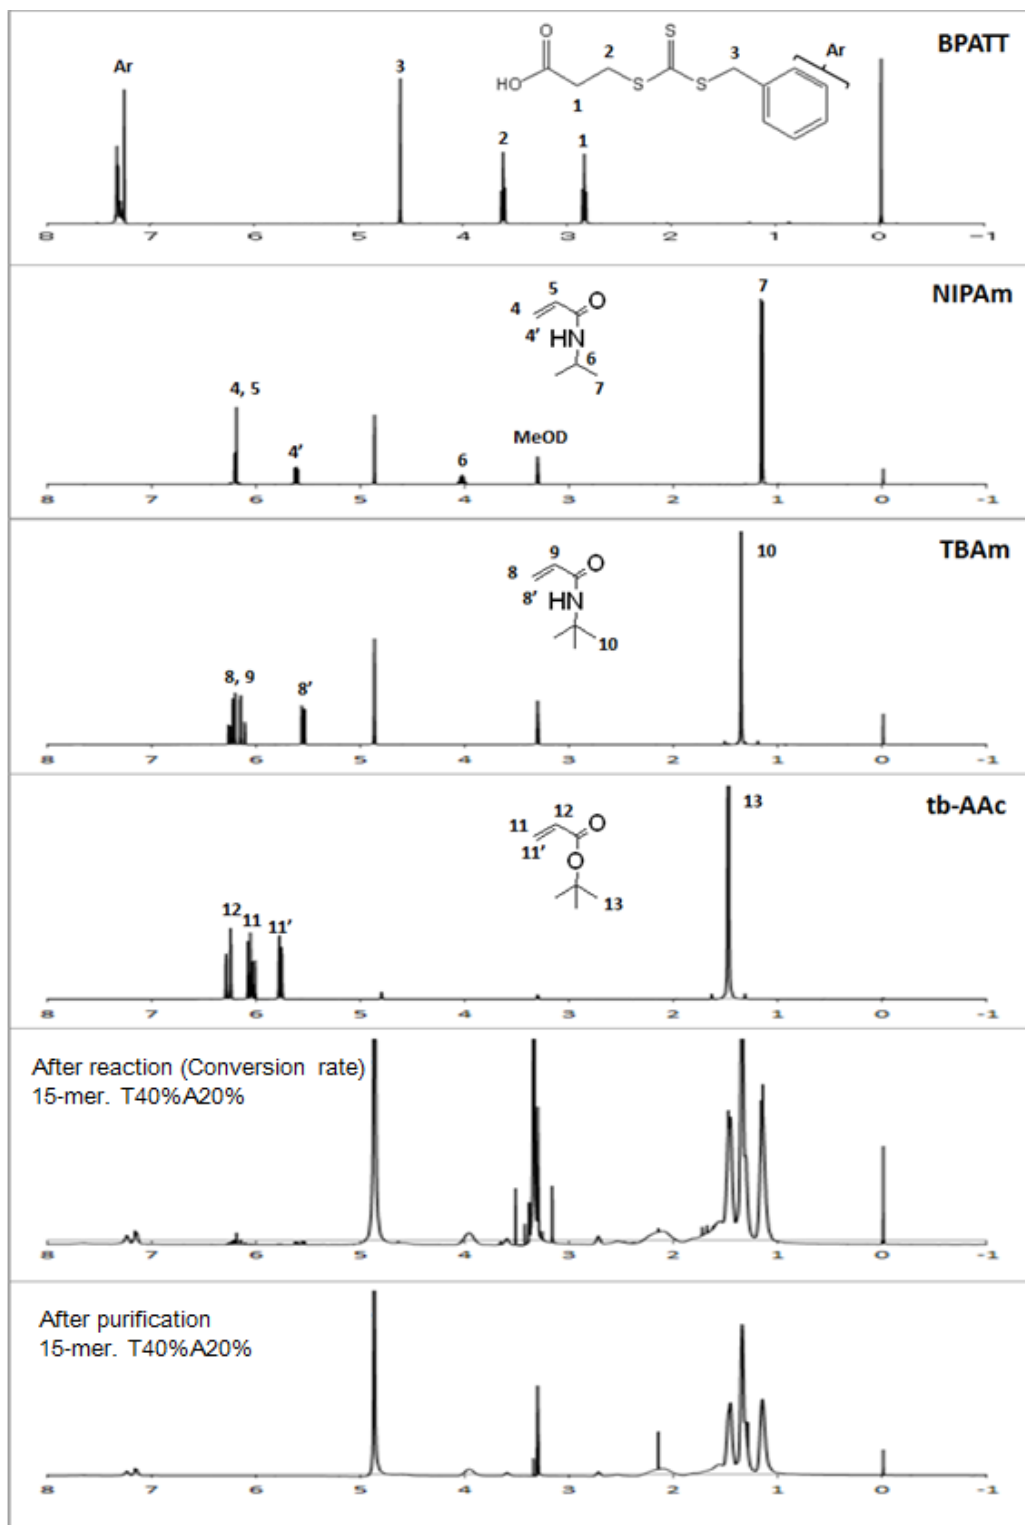

**Figure S1-22.**  $^1\text{H}$  NMR of 15-mer PL, containing 40 % TBAm and 20 % *tb*-AAc

## S2. HPLC analysis of peptides unbound by synthetic PL

All peptides and polymers were dissolved in 35 mM PBS (0.15 M NaCl, pH 7.3) and stored at 4°C. It was confirmed that all PLs were soluble in the buffer and the solutions were transparent even after incubation at 37 °C for 0.5 hr (Figure S2-0 a-c). 1.9 mg/mL of NP, 300-, and 30-mer PLs were added into the peptide mixed solutions (melittin, ponericin and magainin1, 0.1 mM each) in 35 mM PBS (0.15 M NaCl, pH 7.3) and incubated at 37°C for 0.5 hr. Then, the incubated solutions were filtered with centrifugal filter system for 0.5 hr (Milipore Co., Amicon Ultra-0.5, NMWL 10K, 8000 G at 37°C). We confirmed that PLs were separated from the solution by this filtration process (Figure S2-0 d). After centrifugation, 7  $\mu$ L of the filtrate were injected on a CAPCELL PAK C18 column for separation by high performance liquid chromatography (HPLC). The mobile phase consisted of 0.1 % TFA dissolved in acetonitrile/water. The linear elution gradient is illustrated in **Figure S2-1**. Flow rate of the mobile phase was 1 mL/min. The column was kept at 37 °C, and elution was monitored at 220 nm.

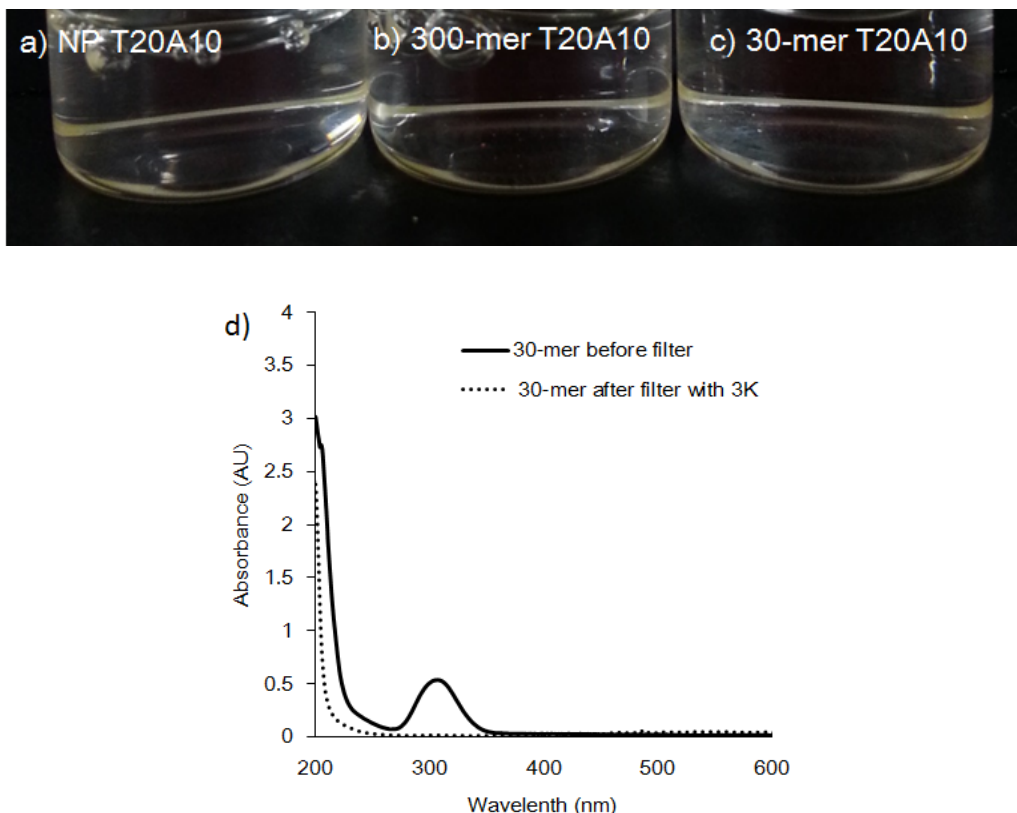

**Figure S2-0.** a-c Photographs of polymer solutions (0.1 mM) after incubation at 37°C for 0.5 hr. d UV-vis spectra of buffer solution of 30-mer PLs before and after filtration.

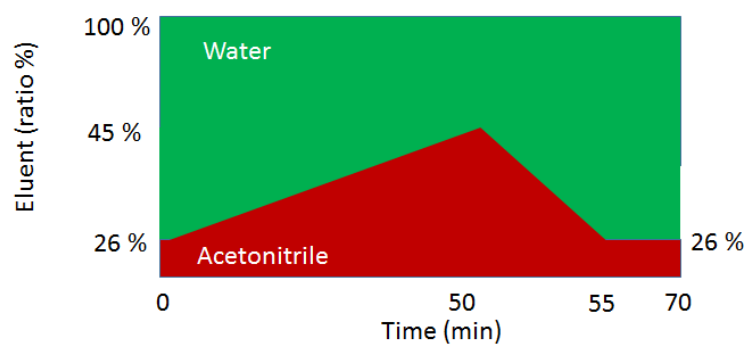

**Figure S2-1.** HPLC scheme

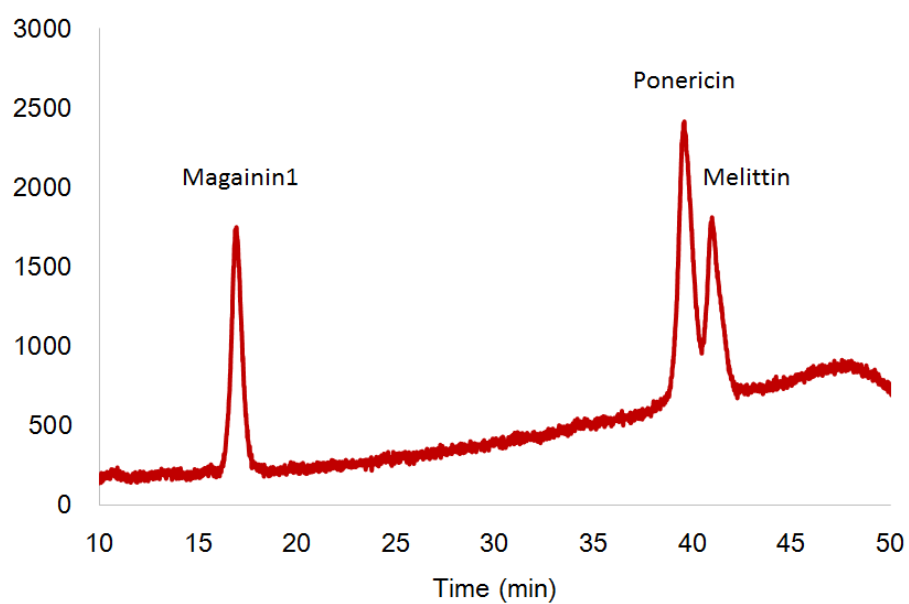

**Figure S2-2.** A mixture of free lytic peptides, consisting of magainin 1, ponericin, and melittin (concentration of peptides: 0.1 mM each).

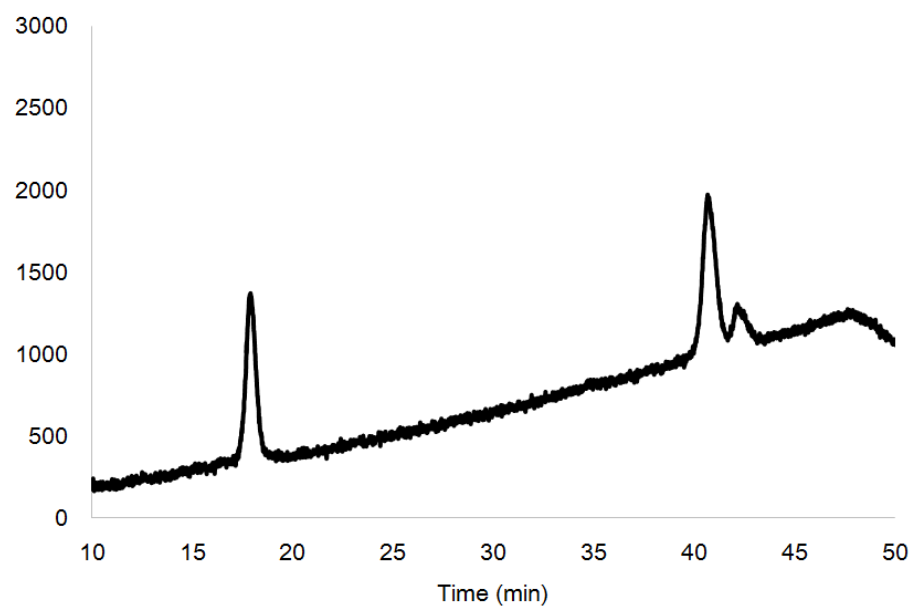

**Figure S2-3.** Peptides unbound by NP (T20%A10%)  
(concentration of peptides: 0.1 mM each, concentration of NP: 1.9 mg/mL)

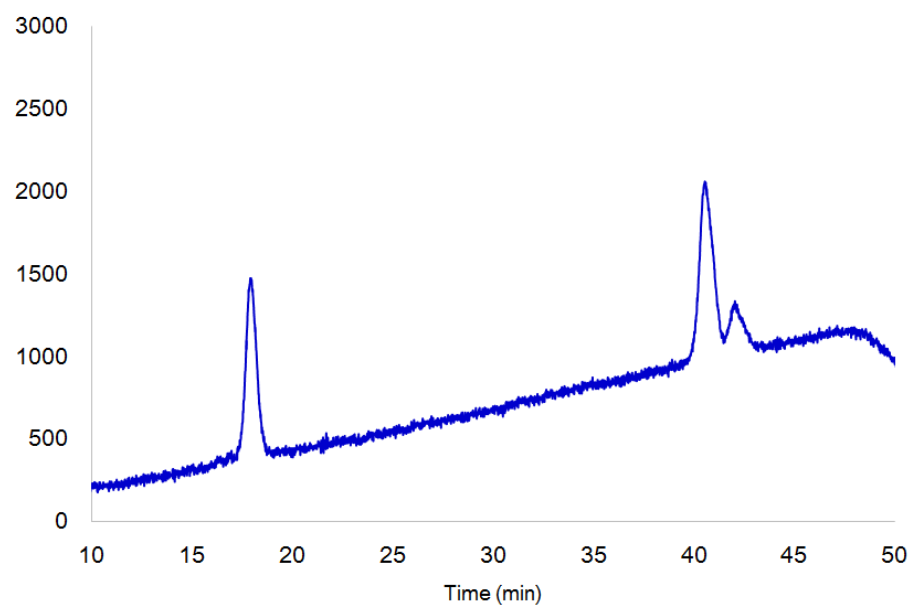

**Figure S2-4.** Peptides not bound by 300-mer PL (T20%A10%)  
(concentration of peptides: 0.1 mM each, concentration of 300-mer PL: 1.9 mg/mL)

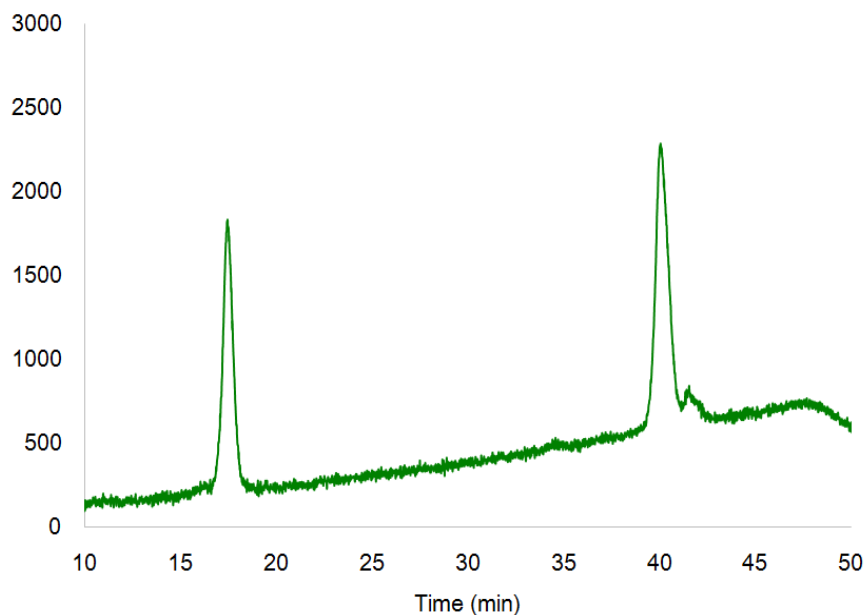

**Figure S2-5.** Peptides not bound by 30-mer PL (T20%A10%)  
(concentration of peptides: 0.1 mM each, concentration of 30-mer PL: 1.9 mg/mL)

### S3. ITC titration of magainin 1 into synthetic PL

#### [General ITC titration procedure]

All peptides and polymers were dissolved in 35 mM PBS (0.15 M NaCl, pH 7.3) and stored at 4°C. After degassing the polymer ligands solution (0.38 mg/mL), it was loaded into a ITC reaction cell and the reference cell was loaded with degassed MilliQ water. The instrument was equilibrated at 37°C until the baseline was flat and stable. Peptide solution (0.5 mM) was degassed and loaded in syringe. Each titration was programmed for 25 injections with 10  $\mu$ L. The spacing between injections was 150 s. The reference power was 10  $\mu$ cal/s. Titrations were conducted at 37°C with a stirring speed of 310 rpm. The raw data was analyzed by ORIGIN software.

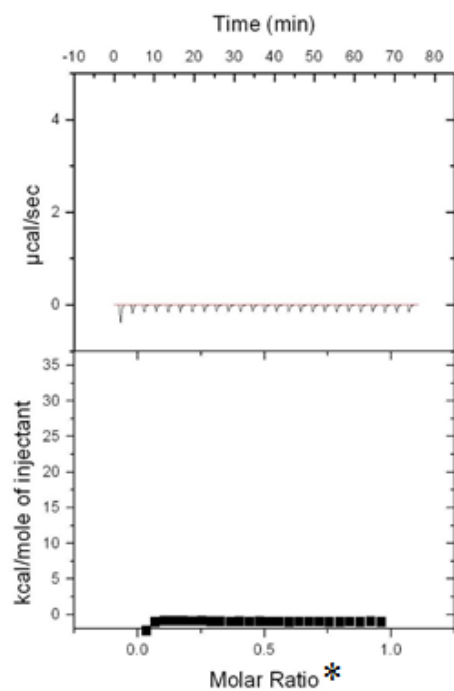

**Figure S3-1.** ITC titration of magainin 1 into NP (T20%A10%)

|         |                                                                               |
|---------|-------------------------------------------------------------------------------|
| Cell    | 0.38 mg/mL NP with 20 %TBAm and 10 % AAc<br>in 35 mM PBS (pH 7.3, 0.15M NaCl) |
| syringe | 0.5 mM magainin 1 in 35 mM PBS (pH 7.3, 0.15M NaCl)                           |

\* Apparent molar ratio

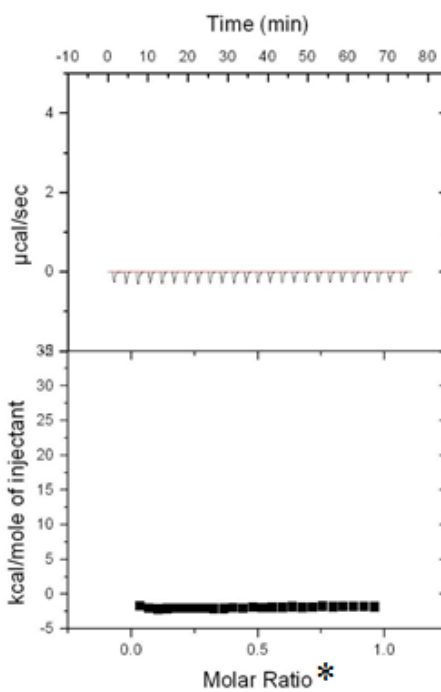

**Figure S3-2.** ITC titration of magainin 1 into 300-mer PL (T20%A10%)

|         |                                                                                     |
|---------|-------------------------------------------------------------------------------------|
| Cell    | 0.38 mg/mL 300-mer PL with 20 % TBAm and 10 % AAc in 35 mM PBS (pH 7.3, 0.15M NaCl) |
| syringe | 0.5 mM magainin 1 in 35 mM PBS (pH 7.3, 0.15M NaCl)                                 |

\* Apparent molar ratio



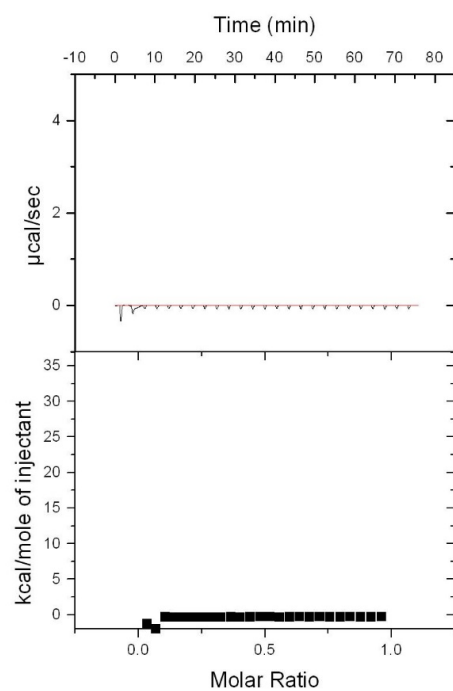

**Figure S3-3.** ITC titration of magainin 1 into 30-mer PL (T20%A10%)

|         |                                                                                       |
|---------|---------------------------------------------------------------------------------------|
| Cell    | 0.38 mg/mL 30-mer PL with 20 % TBAm and 10 % AAc<br>in 35 mM PBS (pH 7.3, 0.15M NaCl) |
| syringe | 0.5 mM magainin 1 in 35 mM PBS (pH 7.3, 0.15M NaCl)                                   |

## S4. ITC titration of melittin or ponericin into synthetic PL

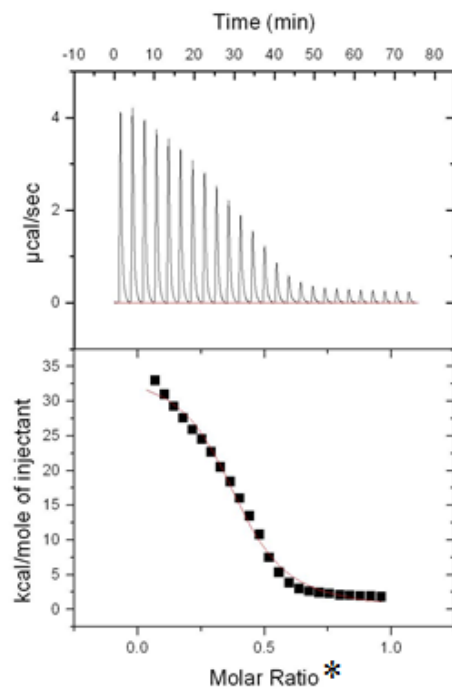

**Figure S4-1.** ITC titration of melittin into NP (T20%A10%)

|         |                                                                                         |
|---------|-----------------------------------------------------------------------------------------|
| Cell    | 0.38 mg/mL NP that contains 20 % TBAm and 10 % AAc<br>in 35 mM PBS (pH 7.3, 0.15M NaCl) |
| syringe | 0.5 mM melittin in 35 mM PBS (pH 7.3, 0.15M NaCl)                                       |

\* Apparent molar ratio

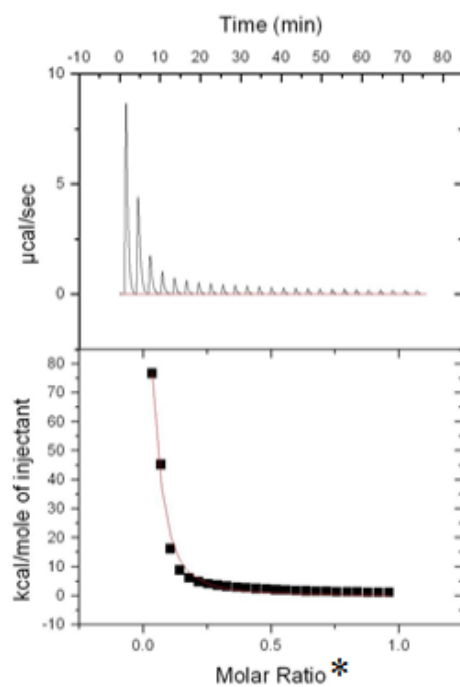

**Figure S4-2.** ITC titration of melittin into 300-mer PL (T20%A10%)

|         |                                                                                                 |
|---------|-------------------------------------------------------------------------------------------------|
| Cell    | 0.38 mg/mL 300-mer with 20 % TBA <sub>m</sub> and 10 % AAc<br>in 35 mM PBS (pH 7.3, 0.15M NaCl) |
| syringe | 0.5 mM melittin in 35 mM PBS (pH 7.3, 0.15M NaCl)                                               |

\* Apparent molar ratio

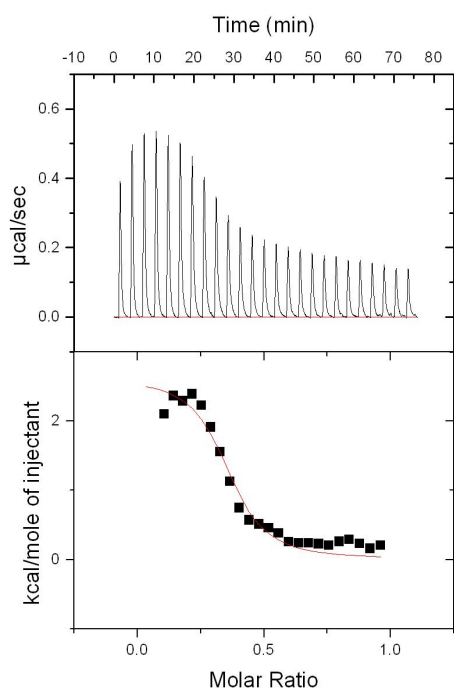

**Figure S4-3.** ITC titration of melittin into 30-mer PL (T20%A10%)

|         |                                                                                       |
|---------|---------------------------------------------------------------------------------------|
| Cell    | 0.38 mg/mL 30-mer PL with 20 % TBAm and 10 % AAc<br>in 35 mM PBS (pH 7.3, 0.15M NaCl) |
| syringe | 0.5 mM melittin in 35 mM PBS (pH 7.3, 0.15M NaCl)                                     |

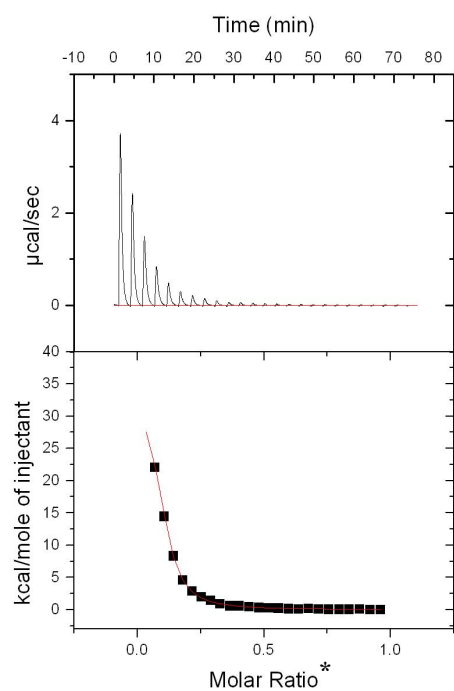

**Figure S4-4.** ITC titration of ponicin into NP (T20%A10%)

|         |                                                                                            |
|---------|--------------------------------------------------------------------------------------------|
| Cell    | 0.38 mg/mL NP functionalized with 20 % TBAm and 10 % AAc in 35 mM PBS (pH 7.3, 0.15M NaCl) |
| syringe | 0.5 mM ponicin in 35 mM PBS (pH 7.3, 0.15M NaCl)                                           |

\* Apparent molar ratio

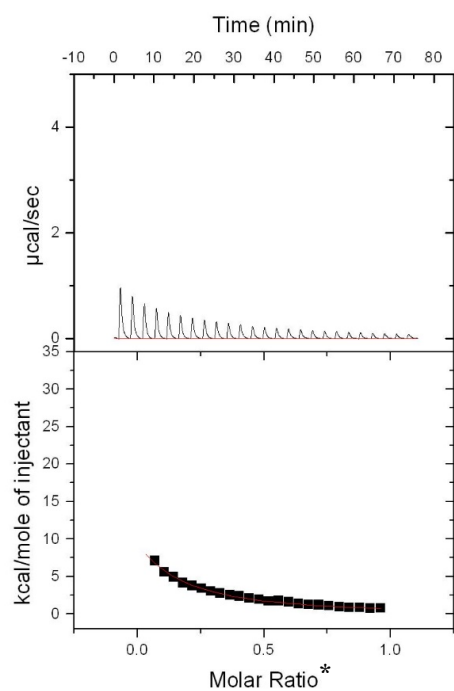

**Figure S4-5.** ITC titration of ponericin into 300-mer PL (T20%A10%)

|         |                                                                                        |
|---------|----------------------------------------------------------------------------------------|
| Cell    | 0.38 mg/mL 300-mer PL with 20 % TBAm and 10 % AAc<br>in 35 mM PBS (pH 7.3, 0.15M NaCl) |
| syringe | 0.5 mM ponericin in 35 mM PBS (pH 7.3, 0.15M NaCl)                                     |

\* Apparent molar ratio

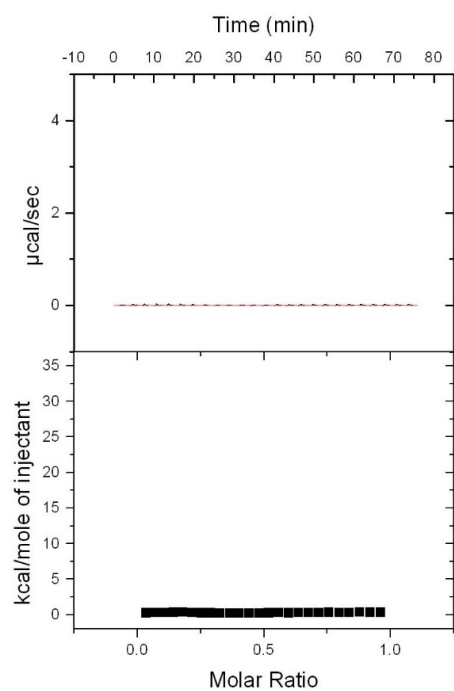

**Figure S4-6.** ITC titration of ponericin into 30-mer PL (T20%A10%)

|         |                                                                                       |
|---------|---------------------------------------------------------------------------------------|
| Cell    | 0.38 mg/mL 30-mer PL with 20 % TBAm and 10 % AAc<br>in 35 mM PBS (pH 7.3, 0.15M NaCl) |
| syringe | 0.5 mM ponericin in 35 mM PBS (pH 7.3, 0.15M NaCl)                                    |

## S5. Hemolysis neutralization assay

Red blood cells (RBC) were washed with PBS, collected by centrifugation for 10 min at 800× *g*, and then resuspended in PBS. The RBC was then incubated with PLs for 30 min at 37 °C in PBS. A mixture of melittin and PL was then added to 100 mL cells to a final volume of 200 mL. The resulting suspension was incubated at 37 °C for 30 min. Samples were then centrifuged at 800× *g* for 10 min. Released hemoglobin was measured by measuring the absorbance of the supernatant at 415 nm ( $Abs_{\text{polymer ligand}}$ ). Control values for 0% neutralization and 100% neutralization were obtained, respectively, from cells incubated with 1.8 mM melittin only ( $Abs_{0\%}$ ) and RBC only ( $Abs_{100\%}$ ). Percent neutralization was calculated according to S6.

## S6. Formula for % neutralization (E1)

$$\text{Neutralization \%} = \frac{Abs_{100\%} - Abs_{\text{Polymer ligand}}}{Abs_{100\%} - Abs_{0\%}} \times 100$$



## S7. HPLC analysis of lytic peptides unbound by low-MW PL

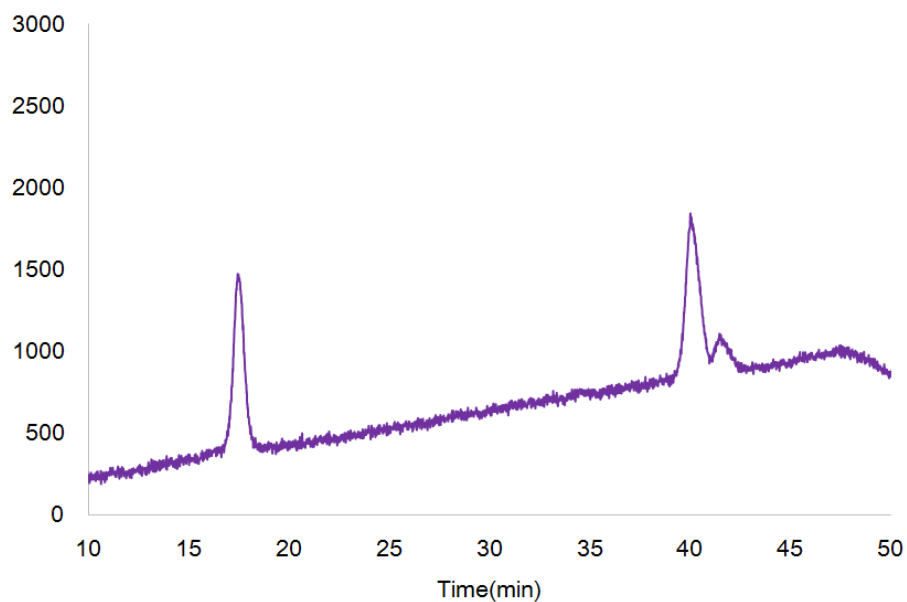

**Figure S7-1.** Peptides unbound by 30-mer PL (T20%A20%)  
(concentration of peptides: 0.1 mM each, concentration of 30-mer PL: 1.9 mg/mL)

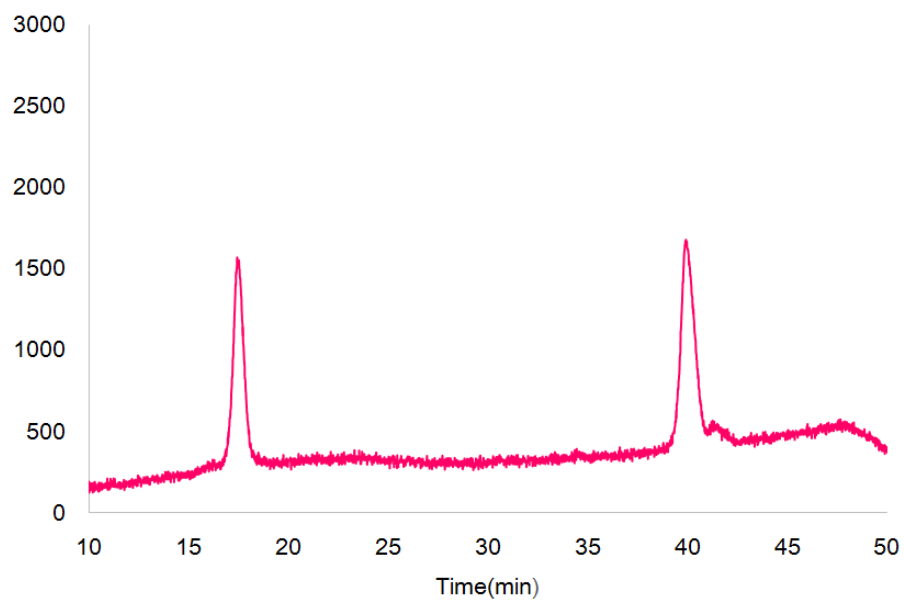

**Figure S7-2.** Peptides unbound by 30-mer PL (T40%A10%)  
(concentration of peptides: 0.1 mM each, concentration of 30-mer PL: 1.9 mg/mL)

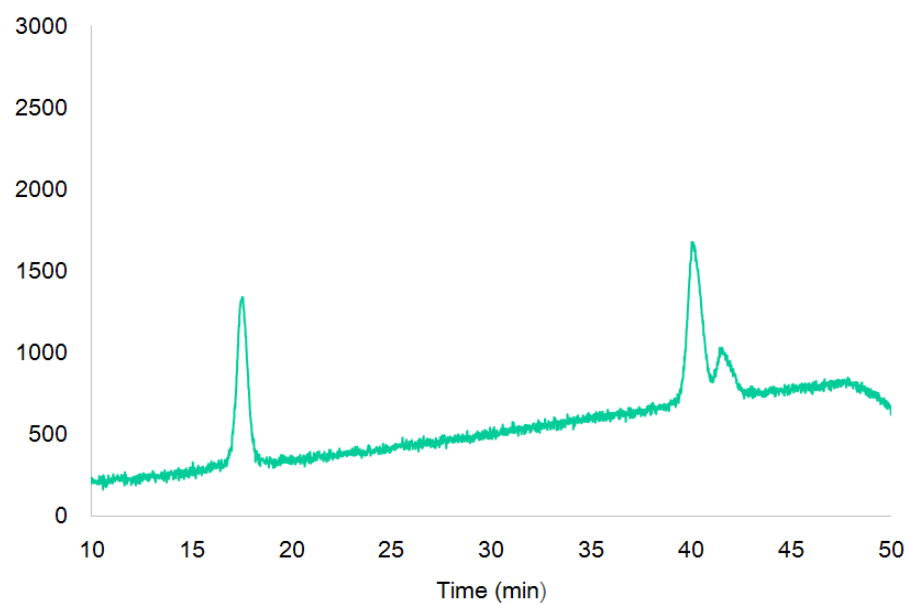

**Figure S7-3.** Peptides unbound by 15-mer PL (T40%A20%)  
(concentration of peptides: 0.1 mM each, concentration of 15-mer PL: 1.9 mg/mL)

#### Reference

1. Stenzel, M.H.; Davis, T. P. *J. Polym. Sci. A.*, **2002**, *40*, 4498-4512
